# Supplementary material for: TopBP1 utilises a bipartite GINS binding mode to support genome replication
Source: PubMed Central journal article supplement (PMC10899662; doi:10.1038/s41467-024-45946-0), 2024-02-27
Supplement: 41467_2024_45946_MOESM3_ESM.pdf [file 41467_2024_45946_MOESM3_ESM.pdf]

## Description of Additional Supplementary Files

File Name: Supplementary Data 1

Description: **List of crosslinked GINI region peptides found by mass spectrometry** (experiment supplementary Fig.S10).

File Name: Supplementary Data 2

Description: **List with statistical analysis of peptides found on chromatin by CHROMASS** (experiment Fig. 6a-c, Supplementary Fig. 14).

File Name: Supplementary Data 3

Description: **Detailed information of antibodies (sheet 1) and plasmids (sheet 2) used in this study.**
