# Supplementary material for: TopBP1 utilises a bipartite GINS binding mode to support genome replication
Source: PubMed Central journal article supplement (PMC10899662; doi:10.1038/s41467-024-45946-0), 2024-02-27
Supplement: 41467_2024_45946_MOESM4_ESM.pdf [file 41467_2024_45946_MOESM4_ESM.pdf]

## Number of PSM's for

| Cross link IGD                          | Search engine | Scan Number            | #PSM's total |
|-----------------------------------------|---------------|------------------------|--------------|
| TopBP11-766-strep (482) Psfl (61)       | pLink2        | BT06_15829             | 1            |
| TopBP11-766-strep (480) Psfl (63)       | MM            | BT06_15955_15955       | 2            |
| TopBP11-766-strep (475) Psfl (63)       | MM            | BT05_13950_13939_13952 | 3            |
|                                         |               | BT06_14182             | 1            |
|                                         | pLink2        | BT07_13724             | 1            |
|                                         |               | BT04_13388             | 1            |
|                                         |               | BT05_13939_13952       | 2            |
|                                         |               | BT06_14182             | 1            |
|                                         |               | BT07_13713             | 1            |
| TopBP11-766-strep (468) Psfl (63)       | pLink2        | BT05_12836             | 1            |
|                                         |               | BT06_12998             | 1            |
| TopBP11-766-strep (466) Psfl (63)       | pLink2        | BT05_14419             | 1            |
|                                         |               | BT06_14715             | 1            |
|                                         |               | BT07_14217             | 1            |
|                                         |               |                        |              |
| TopBP11-766-strep (475) PsfIII (80)     | pLink2        | BT06_10244             | 1            |
| TopBP11-766-strep (474) PsfIII (80)     | pLink2        | BT06_9156              | 1            |
| IGD TopBP11-766-strep (473) PsfIII (80) | pLink2        | BT05_9151              | 1            |
| TopBP11-766-strep (468) PsfIII (80)     | pLink2        | BT05_8482              | 1            |
|                                         |               | BT06_8457              | 1            |
| TopBP11-766-strep (466) PsfIII (80)     | pLink2        | BT05_10736             | 1            |
|                                         |               | BT07_10624             | 1            |

| Cross link ISD                      | Search engine | Scan Number            | #PSM's total |
|-------------------------------------|---------------|------------------------|--------------|
| TopBP11-766-strep (482) Psfl (61)   | MM            | BT01_45717             | 1            |
| TopBP11-766-strep (480) Psfl (63)   | MM            | BT01_45733             | 1            |
| TopBP11-766-strep (475) Psfl (63)   | pLink2        | BT01_33941_33922       | 2            |
| TopBP11-766-strep (468) Psfl (63)   | pLink2        | BT01_29586_29534_29519 | 3            |
| TopBP11-766-strep (466) Psfl (63)   | pLink2        | BT01_35956             | 1            |
| TopBP11-766-strep (480) PsfIII (80) | pLink2        | BT01_22561             | 1            |
| TopBP11-766-strep (475) PsfIII (80) | pLink2        | BT01_21105_21106       | 2            |
| TopBP11-766-strep (474) PsfIII (80) | pLink2        | BT01_17827             | 1            |
| TopBP11-766-strep (468) PsfIII (80) | pLink2        | BT01_16312_16316       | 2            |
| TopBP11-766-strep (466) PsfIII (80) | pLink2        | BT01_21980             | 1            |
| TopBP11-766-strep (480) PsfIII (74) | MM            | BT01_57130             | 1            |

ISD= in-solution digest; IGD= in-gel digest

IGD TopBP11-766-strep (482) Psfl (61)

DFAPSEKHEQADEDLLSQYENGSSSTVVEAK

|

SDLIPTIKFR

DFAPSEKHEQADEDLLSQYENGSSSTVVEAK, MH+ 4650.2734, m/z 930.8605

File: ACE\_0704\_BT06-calib.msML, Scan: 15829, Exp. m/z: 931.4592095799338, Charge: 5

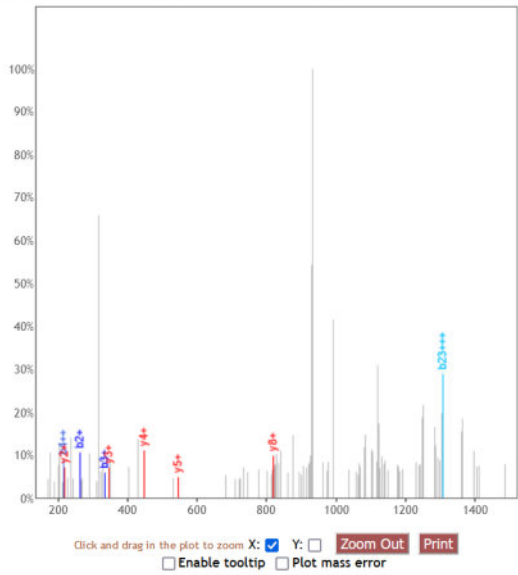

| b+        | b2+       | b3+       | #  | Seq # | y+ | y2+       | y3+       |
|-----------|-----------|-----------|----|-------|----|-----------|-----------|
| 116.0342  | 58.5207   | 39.3496   | 1  | D     | 30 |           |           |
| 263.1026  | 132.0550  | 88.3724   | 2  | F     | 29 | 4535.2464 | 2268.1268 |
| 334.1397  | 167.5735  | 112.0514  | 3  | A     | 28 | 4388.1780 | 2194.5926 |
| 431.1925  | 216.0999  | 144.4024  | 4  | P     | 27 | 4317.1409 | 2159.0741 |
| 518.2245  | 259.6159  | 173.4130  | 5  | S     | 26 | 4220.0881 | 2110.5477 |
| 647.2671  | 324.1372  | 216.4272  | 6  | E     | 25 | 4133.0561 | 2067.0317 |
| 2102.1168 | 1051.5621 | 701.3771  | 7  | K     | 24 | 4004.0135 | 2002.5104 |
| 2239.1757 | 1120.0915 | 747.0634  | 8  | H     | 23 | 2549.1638 | 1275.0855 |
| 2368.2183 | 1184.6128 | 790.0776  | 9  | E     | 22 | 2412.1049 | 1206.5561 |
| 2496.2769 | 1248.6421 | 832.7638  | 10 | Q     | 21 | 2283.0623 | 1142.0348 |
| 2567.3140 | 1284.1607 | 856.4429  | 11 | A     | 20 | 2155.0037 | 1078.0055 |
| 2682.3410 | 1341.6741 | 894.7852  | 12 | D     | 19 | 2083.9666 | 1042.4869 |
| 2811.3836 | 1406.1954 | 937.7994  | 13 | E     | 18 | 1968.9397 | 984.9735  |
| 2926.4105 | 1463.7089 | 976.1417  | 14 | D     | 17 | 1839.8971 | 920.4522  |
| 3039.4946 | 1520.2509 | 1013.8364 | 15 | L     | 16 | 1724.8701 | 862.9387  |
| 3152.5786 | 1576.7930 | 1051.5311 | 16 | L     | 15 | 1611.7861 | 806.3967  |
| 3239.6107 | 1620.3090 | 1080.5417 | 17 | S     | 14 | 1498.7020 | 749.8546  |
| 3367.6692 | 1684.3383 | 1123.2279 | 18 | Q     | 13 | 1411.6700 | 706.3386  |
| 3530.7326 | 1765.8699 | 1177.5824 | 19 | Y     | 12 | 1283.6114 | 642.3093  |
| 3659.7752 | 1830.3912 | 1220.5966 | 20 | E     | 11 | 1120.5481 | 560.7777  |
| 3773.8181 | 1887.4127 | 1258.6109 | 21 | N     | 10 | 991.5055  | 496.2564  |
| 3830.8396 | 1915.9234 | 1277.6180 | 22 | G     | 9  | 877.4625  | 439.2349  |
| 3917.8716 | 1959.4394 | 1306.4287 | 23 | S     | 8  | 820.4411  | 410.7242  |
| 4004.9036 | 2002.9554 | 1335.6394 | 24 | S     | 7  | 733.4090  | 367.2082  |
| 4105.9513 | 2053.4793 | 1369.3219 | 25 | T     | 6  | 646.3770  | 323.6921  |
| 4205.0197 | 2103.0135 | 1402.3448 | 26 | V     | 5  | 545.3293  | 273.1683  |
| 4304.0881 | 2152.5477 | 1435.3676 | 27 | V     | 4  | 446.2609  | 223.6341  |
| 4433.1307 | 2217.0690 | 1478.3818 | 28 | E     | 3  | 347.1925  | 174.0999  |
| 4504.1678 | 2252.5876 | 1502.0608 | 29 | A     | 2  | 218.1499  | 109.5786  |
|           |           |           | 30 | K     | 1  | 147.1128  | 74.0600   |

[Click] to move table

Linked Peptide + Linker Mass: 1326.75

Linker Mass: 138.06808

SDLIPTIKFR, MH+ 4650.2734, m/z 930.8605

File: ACE\_0704\_BT06-calib.msML, Scan: 15829, Exp. m/z: 931.4592095799338, Charge: 5

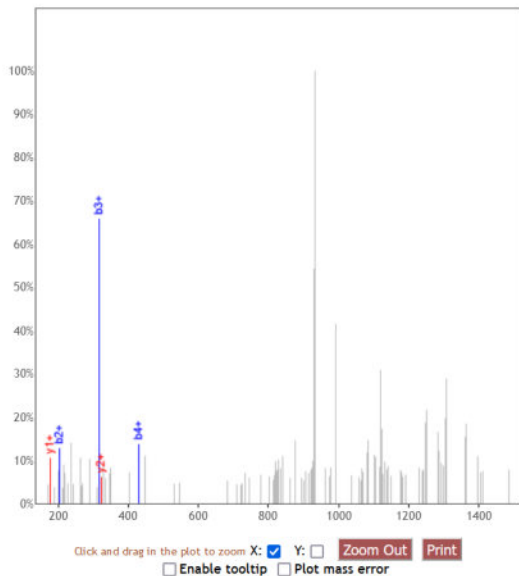

| b+        | b2+       | b3+       | #  | Seq # | y+ | y2+       | y3+       |
|-----------|-----------|-----------|----|-------|----|-----------|-----------|
| 88.0393   | 44.5233   | 30.0180   | 1  | S     | 10 |           |           |
| 203.0662  | 102.0368  | 68.3603   | 2  | D     | 9  | 4563.2413 | 2282.1243 |
| 316.1503  | 158.5788  | 106.0550  | 3  | L     | 8  | 4448.2144 | 2224.6108 |
| 429.2344  | 215.1208  | 143.7496  | 4  | I     | 7  | 4335.1303 | 2168.0688 |
| 526.2871  | 263.6472  | 176.1006  | 5  | P     | 6  | 4222.0463 | 2111.5268 |
| 4087.9142 | 2044.4608 | 1363.3096 | 6  | T     | 5  | 4124.9935 | 2063.0004 |
| 4200.9983 | 2101.0028 | 1401.0043 | 7  | I     | 4  | 563.3664  | 282.1868  |
| 4329.0933 | 2165.0503 | 1443.7026 | 8  | K     | 3  | 450.2823  | 225.6448  |
| 4476.1617 | 2238.5845 | 1492.7254 | 9  | F     | 2  | 322.1874  | 161.5973  |
|           |           |           | 10 | R     | 1  | 175.1190  | 88.0631   |

[Click] to move table

Linked Peptide + Linker Mass: 3460.58

Linker Mass: 138.06808

IGD TopBP11-766-strep (480) Psfl (63)

DFAPSEKHEQADEDLLSQYENGSSTVVEAK

|

SDLIPTIKFR

DFAPSEKHEQADEDLLSQYENGSSTVVEAK, MH+ 4650.2734, m/z 930.8605  
 File: ACE\_0704\_BT06-calib.mzML, Scan: 15955, Exp. m/z: 931.2626829743398, Charge: 5

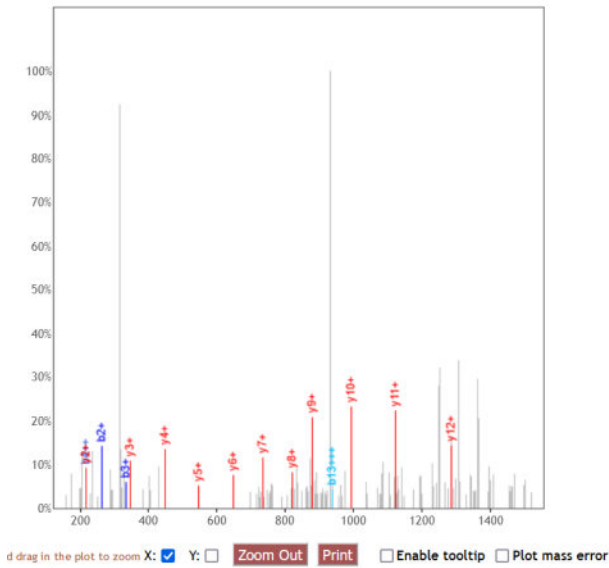

| b-        | b2-       | b3-       | #  | Seq # | y-        | y2-       | y3-       |
|-----------|-----------|-----------|----|-------|-----------|-----------|-----------|
| 116.0342  | 58.5207   | 39.3496   | 1  | D 30  |           |           |           |
| 263.1024  | 132.0550  | 88.3724   | 2  | F 29  | 4535.2464 | 2268.1268 | 1512.4203 |
| 334.1397  | 167.5735  | 112.0514  | 3  | A 28  | 4388.1780 | 2194.5926 | 1463.3975 |
| 431.1925  | 216.0999  | 144.4024  | 4  | P 27  | 4317.1409 | 2159.0741 | 1439.7185 |
| 1844.9793 | 922.9933  | 615.6646  | 5  | S 26  | 4220.0881 | 2110.5477 | 1407.3676 |
| 1974.0219 | 987.5146  | 658.6788  | 6  | E 25  | 2806.3014 | 1403.6543 | 936.1053  |
| 2102.1168 | 1051.5621 | 701.3771  | 7  | K 24  | 2677.2588 | 1339.1330 | 893.0911  |
| 2239.1757 | 1120.0915 | 747.0634  | 8  | H 23  | 2549.1638 | 1275.0855 | 850.3928  |
| 2368.2183 | 1184.6128 | 790.0776  | 9  | E 22  | 2412.1049 | 1206.5561 | 804.7065  |
| 2496.2769 | 1248.6421 | 832.7638  | 10 | Q 21  | 2283.0623 | 1142.0348 | 761.6923  |
| 2567.3140 | 1284.1607 | 856.4429  | 11 | A 20  | 2155.0037 | 1078.0055 | 719.0061  |
| 2682.3410 | 1341.6741 | 894.7852  | 12 | D 19  | 2083.9666 | 1042.4869 | 695.3271  |
| 2811.3836 | 1406.1954 | 937.7994  | 13 | E 18  | 1968.9397 | 984.9735  | 656.9847  |
| 2926.4105 | 1463.7089 | 976.1417  | 14 | D 17  | 1839.8971 | 920.4522  | 613.9705  |
| 3039.4946 | 1520.2509 | 1013.8364 | 15 | L 16  | 1724.8701 | 862.9387  | 575.6282  |
| 3152.5786 | 1576.7930 | 1051.5311 | 16 | L 15  | 1611.7861 | 806.3967  | 537.9335  |
| 3239.6107 | 1620.3090 | 1080.5417 | 17 | S 14  | 1498.7020 | 749.8546  | 500.2388  |
| 3367.6692 | 1684.3383 | 1123.2279 | 18 | Q 13  | 1411.6700 | 706.3386  | 471.2282  |
| 3530.7326 | 1765.8699 | 1177.5824 | 19 | Y 12  | 1283.6114 | 642.3093  | 428.5420  |
| 3659.7752 | 1830.3912 | 1220.5966 | 20 | E 11  | 1120.5481 | 560.7777  | 374.1875  |
| 3773.8181 | 1887.4127 | 1258.6109 | 21 | N 10  | 991.5055  | 496.2564  | 331.1733  |
| 3830.8396 | 1915.9234 | 1277.6180 | 22 | G 9   | 877.4625  | 439.2349  | 293.1590  |
| 3917.8716 | 1959.4394 | 1306.6287 | 23 | S 8   | 820.4411  | 410.7242  | 274.1519  |
| 4004.9036 | 2002.9554 | 1335.6394 | 24 | S 7   | 733.4090  | 367.2082  | 245.1412  |
| 4105.9513 | 2053.4793 | 1369.3219 | 25 | T 6   | 646.3770  | 323.6921  | 216.1305  |
| 4205.0197 | 2103.0135 | 1402.3448 | 26 | V 5   | 545.3293  | 273.1683  | 182.4480  |
| 4304.0881 | 2152.5477 | 1435.3676 | 27 | V 4   | 446.2609  | 223.6341  | 149.4252  |
| 4433.1307 | 2217.0690 | 1478.3818 | 28 | E 3   | 347.1925  | 174.0999  | 116.4024  |
| 4504.1678 | 2252.5876 | 1502.0608 | 29 | A 2   | 218.1499  | 109.5786  | 73.3882   |
|           |           |           | 30 | K 1   | 147.1128  | 74.0600   | 49.7091   |

Linked Peptide + Linker Mass: 1326.75  
 Linker Mass: 138.06808

SDLIPTIKFR, MH+ 4650.2734, m/z 930.8605

File: ACE\_0704\_BT06-calib.mzML, Scan: 15955, Exp. m/z: 931.2626829743398, Charge: 5

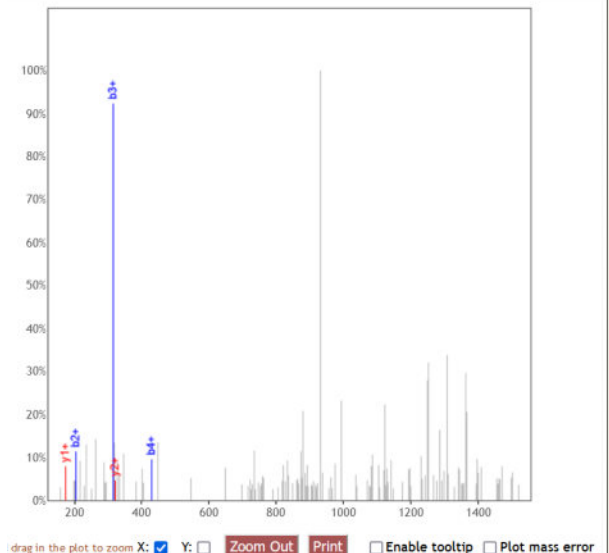

| b-        | b2-       | b3-       | #  | Seq # | y-        | y2-       | y3-       |
|-----------|-----------|-----------|----|-------|-----------|-----------|-----------|
| 88.0393   | 44.5233   | 30.0180   | 1  | S 10  |           |           |           |
| 203.0662  | 102.0368  | 68.3603   | 2  | D 9   | 4563.2413 | 2282.1243 | 1521.7520 |
| 316.1903  | 158.5788  | 106.0550  | 3  | L 8   | 4448.2144 | 2224.6108 | 1483.4096 |
| 429.2344  | 215.1208  | 143.7496  | 4  | I 7   | 4335.1303 | 2168.0688 | 1445.7150 |
| 526.2871  | 263.6472  | 176.1006  | 5  | P 6   | 4222.0463 | 2111.5268 | 1408.0203 |
| 627.3348  | 314.1710  | 209.7831  | 6  | T 5   | 4124.9935 | 2063.0004 | 1375.6693 |
| 740.4189  | 370.7131  | 247.4778  | 7  | I 4   | 4023.9458 | 2012.4765 | 1341.9868 |
| 4329.0933 | 2165.0503 | 1443.7026 | 8  | K 3   | 3910.8617 | 1955.9345 | 1304.2921 |
| 4476.1617 | 2238.5845 | 1492.7254 | 9  | F 2   | 322.1674  | 161.5973  | 108.0673  |
|           |           |           | 10 | R 1   | 175.1190  | 88.0631   | 59.0445   |

Linked Peptide + Linker Mass: 3460.58  
 Linker Mass: 138.06808

IGD TopBP11-766-strep (475) Psfl (63)

KDFAPSEK

|

SDLIPTIKFR

**KDFAPSEK**, MH+ 2248.2224, m/z 750.0790

File: ACE\_0704\_BT05-calib.mzML, Scan: 13952, Exp. m/z: 750.0783558994867, Charge: 3

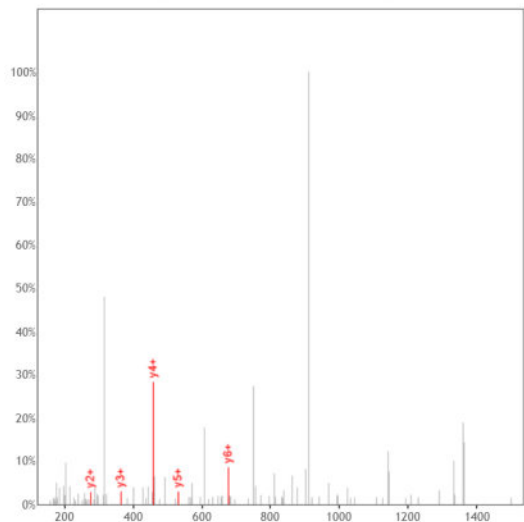

drag in the plot to zoom X:  Y:  **Zoom Out** **Print**  Enable tooltip  Plot mass error

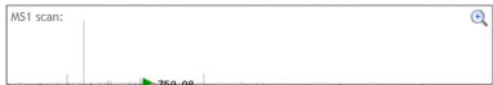

| b+        | b2+       | # | Seq # | y+       | y2+      |
|-----------|-----------|---|-------|----------|----------|
| 1455.8570 | 728.4321  | 1 | K 8   |          |          |
| 1570.8839 | 785.9456  | 2 | D 7   | 793.3727 | 397.1900 |
| 1717.9523 | 859.4798  | 3 | F 6   | 678.3457 | 339.6765 |
| 1788.9894 | 894.9984  | 4 | A 5   | 531.2773 | 266.1423 |
| 1886.0422 | 943.5247  | 5 | P 4   | 460.2402 | 230.6237 |
| 1973.0742 | 987.0408  | 6 | S 3   | 363.1674 | 182.0974 |
| 2102.1168 | 1051.5621 | 7 | E 2   | 276.1554 | 138.5813 |
|           |           | 8 | K 1   | 147.1128 | 74.0600  |

[\[Click\]](#) to move table

Linked Peptide + Linker Mass: 1326.75

Linker Mass: 138.06808

**SDLIPTIKFR**, MH+ 2248.2224, m/z 750.0790

File: ACE\_0704\_BT05-calib.mzML, Scan: 13952, Exp. m/z: 750.0783558994867, Charge: 3

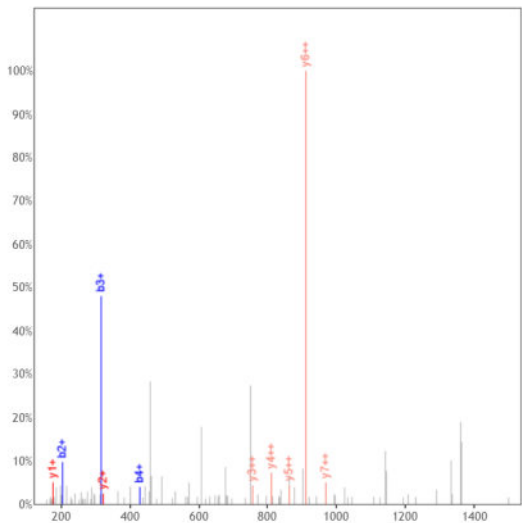

drag in the plot to zoom X:  Y:  **Zoom Out** **Print**  Enable tooltip  Plot mass error

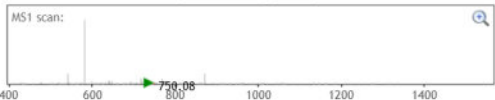

| b+        | b2+       | #  | Seq # | y+        | y2+       |
|-----------|-----------|----|-------|-----------|-----------|
| 88.0393   | 44.5233   | 1  | S 10  |           |           |
| 203.0662  | 102.0368  | 2  | D 9   | 2161.1903 | 1081.0988 |
| 316.1503  | 158.5788  | 3  | L 8   | 2046.1634 | 1023.5853 |
| 429.2344  | 215.1208  | 4  | I 7   | 1933.0793 | 967.0433  |
| 526.2871  | 263.6472  | 5  | P 6   | 1819.9953 | 910.5013  |
| 627.3348  | 314.1710  | 6  | T 5   | 1722.9425 | 861.9749  |
| 740.4189  | 370.7131  | 7  | I 4   | 1621.8948 | 811.4510  |
| 1927.0423 | 964.0248  | 8  | K 3   | 1508.8108 | 754.9090  |
| 2074.1107 | 1037.5590 | 9  | F 2   | 322.1874  | 161.5973  |
|           |           | 10 | R 1   | 175.1190  | 88.0631   |

[\[Click\]](#) to move table

Linked Peptide + Linker Mass: 1058.53

Linker Mass: 138.06808

IGD TopBP11-766-strep (468) Psfl (63)

KNSSFSK

|

SDLIPTIKFR

**KNSSFSK**, MH+ 2124.1699, m/z 708.7281

File: ACE\_0704\_BT06.mzML, Scan: 12998, Exp. m/z: 708.728759765625, Charge: 3

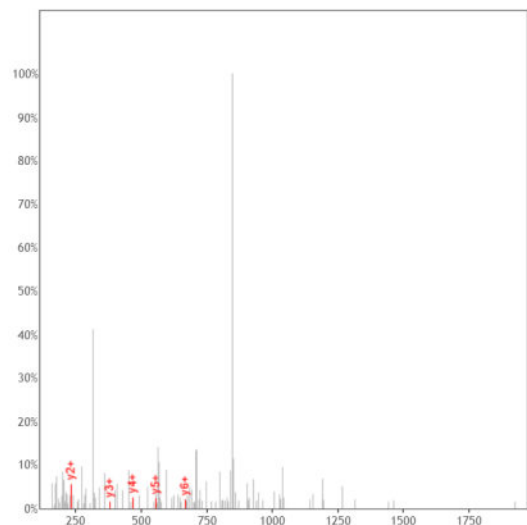

drag in the plot to zoom X:  Y:  [Zoom Out](#) [Print](#)  Enable tooltip  Plot mass error

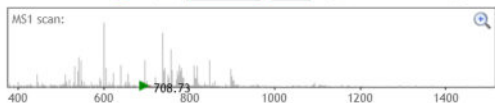

| b <sup>+</sup> | b2 <sup>+</sup> | # | Seq # | y <sup>+</sup> | y2 <sup>+</sup> |
|----------------|-----------------|---|-------|----------------|-----------------|
| 1455.8569      | 728.4321        | 1 | K 7   |                |                 |
| 1569.8998      | 785.4536        | 2 | N 6   | 669.3202       | 335.1638        |
| 1656.9319      | 828.9696        | 3 | S 5   | 555.2773       | 278.1423        |
| 1743.9639      | 872.4856        | 4 | S 4   | 468.2453       | 234.6263        |
| 1891.0323      | 946.0198        | 5 | F 3   | 381.2132       | 191.1103        |
| 1978.0643      | 989.5358        | 6 | S 2   | 234.1448       | 117.5761        |
|                |                 | 7 | K 1   | 147.1128       | 74.0600         |

[\(Click\)](#) to move table

Static Modifications:  
C: 57.0215  
Linked Peptide + Linker Mass: 1326.75  
Linker Mass: 138.068

**SDLIPTIKFR**, MH+ 2124.1699, m/z 708.7281

File: ACE\_0704\_BT06.mzML, Scan: 12998, Exp. m/z: 708.728759765625, Charge: 3

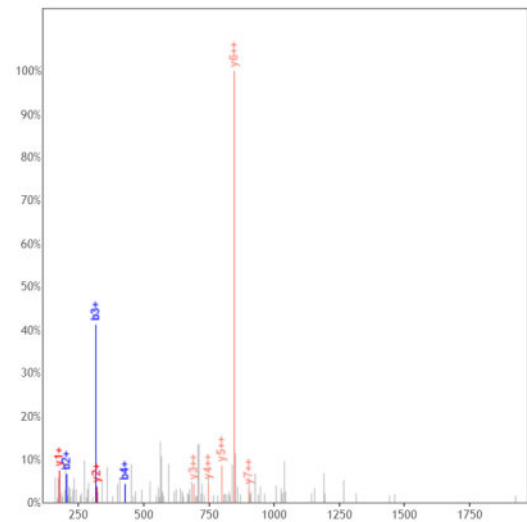

drag in the plot to zoom X:  Y:  [Zoom Out](#) [Print](#)  Enable tooltip  Plot mass error

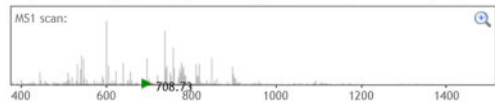

| b <sup>+</sup> | b2 <sup>+</sup> | #  | Seq # | y <sup>+</sup> | y2 <sup>+</sup> |
|----------------|-----------------|----|-------|----------------|-----------------|
| 88.0393        | 44.5233         | 1  | S 10  |                |                 |
| 203.0662       | 102.0368        | 2  | D 9   | 2037.1378      | 1019.0725       |
| 316.1503       | 158.5788        | 3  | L 8   | 1922.1109      | 961.5591        |
| 429.2344       | 215.1208        | 4  | I 7   | 1809.0268      | 909.0170        |
| 526.2871       | 263.6472        | 5  | P 6   | 1695.9428      | 848.4750        |
| 627.3348       | 314.1710        | 6  | T 5   | 1598.8900      | 799.9486        |
| 740.4189       | 370.7131        | 7  | I 4   | 1497.8423      | 749.4248        |
| 1802.9898      | 901.9985        | 8  | K 3   | 1384.7582      | 692.8828        |
| 1950.0582      | 975.5327        | 9  | F 2   | 322.1874       | 161.5973        |
|                |                 | 10 | R 1   | 175.1190       | 88.0631         |

[\(Click\)](#) to move table

Static Modifications:  
C: 57.0215  
Linked Peptide + Linker Mass: 934.48  
Linker Mass: 138.068

IGD TopBP11-766-strep (466) Psfl (63)

AALLKK

|

SDLIPTIKFR

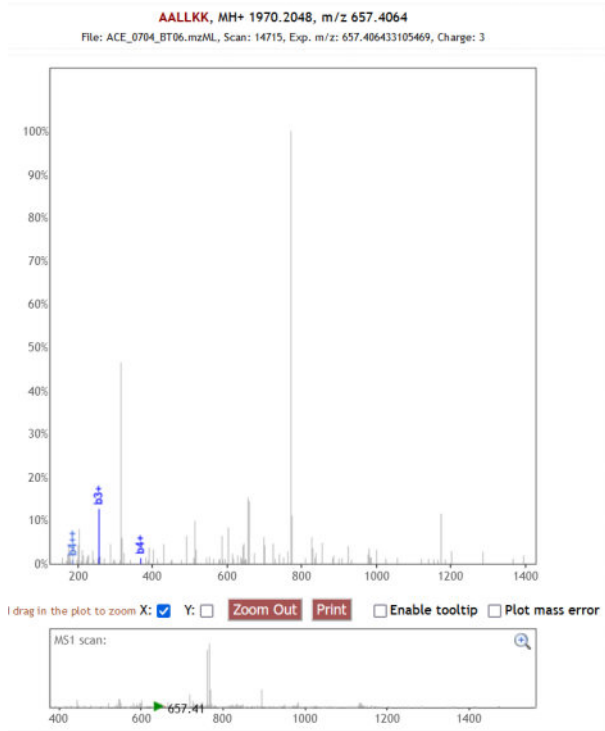

| b+        | b2+      | # | Seq # | y+        | y2+      |
|-----------|----------|---|-------|-----------|----------|
| 72.0444   | 36.5258  | 1 | A 6   |           |          |
| 143.0815  | 72.0444  | 2 | A 5   | 1899.1677 | 950.0875 |
| 256.1656  | 128.5864 | 3 | L 4   | 1828.1306 | 914.5689 |
| 369.2496  | 185.1285 | 4 | L 3   | 1715.0465 | 858.0269 |
| 1824.0993 | 912.5533 | 5 | K 2   | 1601.9624 | 801.4849 |
|           |          | 6 | K 1   | 147.1128  | 74.0600  |

[\[Click\]](#) to move table

Static Modifications:  
 C: 57.0215  
 Linked Peptide + Linker Mass: 1326.75  
 Linker Mass: 138.068

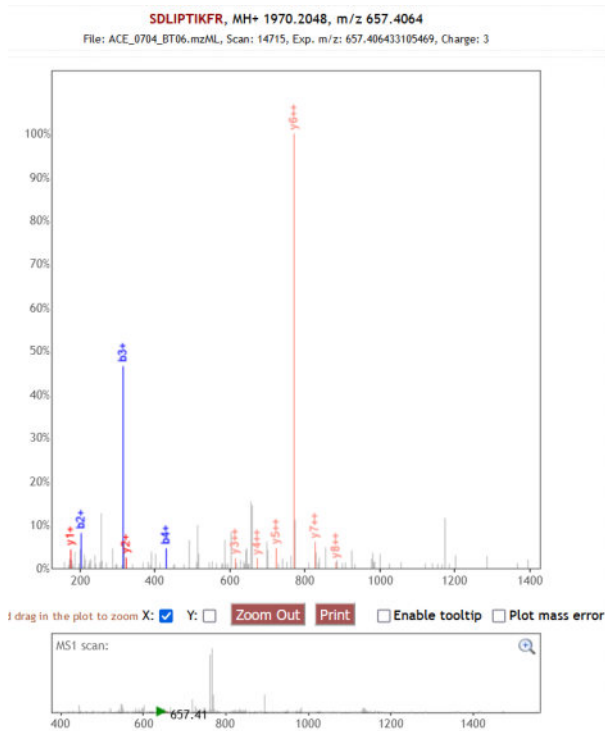

| b+        | b2+      | #  | Seq # | y+        | y2+      |
|-----------|----------|----|-------|-----------|----------|
| 88.0393   | 44.5233  | 1  | S 10  |           |          |
| 203.0662  | 102.0368 | 2  | D 9   | 1883.1728 | 942.0900 |
| 316.1503  | 158.5788 | 3  | L 8   | 1768.1458 | 884.5765 |
| 429.2344  | 215.1208 | 4  | I 7   | 1655.0617 | 828.0345 |
| 526.2871  | 263.6472 | 5  | P 6   | 1541.9777 | 771.4925 |
| 627.3348  | 314.1710 | 6  | T 5   | 1444.9249 | 722.9661 |
| 740.4189  | 370.7131 | 7  | I 4   | 1343.8772 | 672.4423 |
| 1649.0247 | 825.0160 | 8  | K 3   | 1230.7932 | 615.9002 |
| 1796.0931 | 898.5502 | 9  | F 2   | 322.1874  | 161.5973 |
|           |          | 10 | R 1   | 175.1190  | 88.0631  |

[\[Click\]](#) to move table

Static Modifications:  
 C: 57.0215  
 Linked Peptide + Linker Mass: 780.51  
 Linker Mass: 138.068

ISD TopBP11-766-strep (482) Psfl (61)

DFAPSEKHEQADEDLLSQYENGSSSTVVEAK

|

SDLIPTIKFR

DFAPSEKHEQADEDLLSQYENGSSSTVVEAK, MH+ 4650.2734, m/z 1163.3238

File: ACE\_0704\_BT01\_StageTip\_210min-calib.mzML, Scan: 45717, Exp. m/z: 1163.5731668656674, Charge: 4

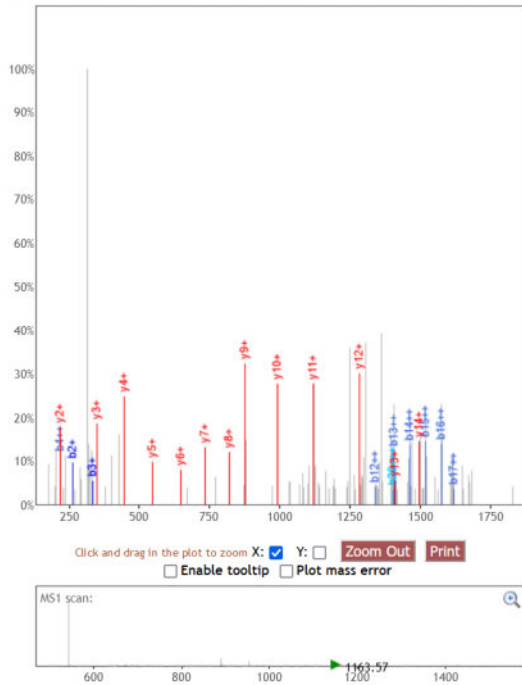

| b-        | b2+       | b3+       | #  | Seq # | y- | y2+       | y3+       |
|-----------|-----------|-----------|----|-------|----|-----------|-----------|
| 116.0342  | 58.5207   | 39.3496   | 1  | D     | 30 |           |           |
| 243.1024  | 132.0550  | 88.3724   | 2  | F     | 29 | 4535.2464 | 2268.1268 |
| 334.1397  | 167.5735  | 112.0514  | 3  | A     | 28 | 4388.1780 | 2194.5926 |
| 431.1925  | 216.0999  | 144.4024  | 4  | P     | 27 | 4317.1409 | 2159.0741 |
| 518.2245  | 259.6159  | 173.4130  | 5  | S     | 26 | 4220.0881 | 2110.5477 |
| 647.2671  | 324.1372  | 216.4272  | 6  | E     | 25 | 4133.0561 | 2067.0317 |
| 2102.1168 | 1051.5621 | 701.3771  | 7  | K     | 24 | 4004.0135 | 2002.5104 |
| 2239.1757 | 1120.0915 | 747.0634  | 8  | H     | 23 | 2549.1638 | 1275.0855 |
| 2368.2183 | 1184.6128 | 790.0776  | 9  | E     | 22 | 2412.1049 | 1206.5561 |
| 2496.2769 | 1248.6421 | 832.7638  | 10 | Q     | 21 | 2283.0623 | 1142.0348 |
| 2567.3140 | 1284.1607 | 856.4429  | 11 | A     | 20 | 2155.0037 | 1078.0055 |
| 2682.3410 | 1341.6741 | 894.7852  | 12 | D     | 19 | 2083.9666 | 1042.4869 |
| 2811.3836 | 1406.1954 | 937.7994  | 13 | E     | 18 | 1968.9397 | 984.9735  |
| 2926.4105 | 1463.7089 | 976.1417  | 14 | D     | 17 | 1839.8971 | 920.4522  |
| 3039.4946 | 1520.2509 | 1013.8364 | 15 | L     | 16 | 1724.8701 | 862.9387  |
| 3152.5786 | 1576.7930 | 1051.5311 | 16 | L     | 15 | 1611.7861 | 806.3967  |
| 3239.6107 | 1620.3090 | 1080.5417 | 17 | S     | 14 | 1498.7020 | 749.8546  |
| 3367.6692 | 1684.3383 | 1123.2279 | 18 | Q     | 13 | 1411.6700 | 706.3386  |
| 3530.7326 | 1765.8699 | 1177.5824 | 19 | Y     | 12 | 1283.6114 | 642.3093  |
| 3659.7752 | 1830.3912 | 1220.5966 | 20 | E     | 11 | 1120.5481 | 560.7777  |
| 3773.8181 | 1887.4127 | 1258.6109 | 21 | N     | 10 | 991.5055  | 496.2564  |
| 3830.8396 | 1915.9234 | 1277.6180 | 22 | G     | 9  | 877.4625  | 439.2349  |
| 3917.8716 | 1959.4394 | 1306.6287 | 23 | S     | 8  | 820.4411  | 410.7242  |
| 4004.9036 | 2002.9554 | 1335.6394 | 24 | S     | 7  | 733.4090  | 367.2082  |
| 4105.9513 | 2053.4793 | 1369.3219 | 25 | T     | 6  | 646.3770  | 323.6921  |
| 4205.0197 | 2103.0135 | 1402.3448 | 26 | V     | 5  | 545.3293  | 273.1683  |
| 4304.0881 | 2152.5477 | 1435.3676 | 27 | V     | 4  | 446.2609  | 223.6341  |
| 4433.1307 | 2217.0690 | 1478.3818 | 28 | E     | 3  | 347.1925  | 174.0999  |
| 4504.1678 | 2252.5876 | 1502.0608 | 29 | A     | 2  | 218.1499  | 109.5786  |
|           |           |           | 30 | K     | 1  | 147.1128  | 74.0600   |

Linked Peptide + Linker Mass: 1326.75  
Linker Mass: 138.06808

SDLIPTIKFR, MH+ 4650.2734, m/z 1163.3238

File: ACE\_0704\_BT01\_StageTip\_210min-calib.mzML, Scan: 45717, Exp. m/z: 1163.5731668656674, Charge: 4

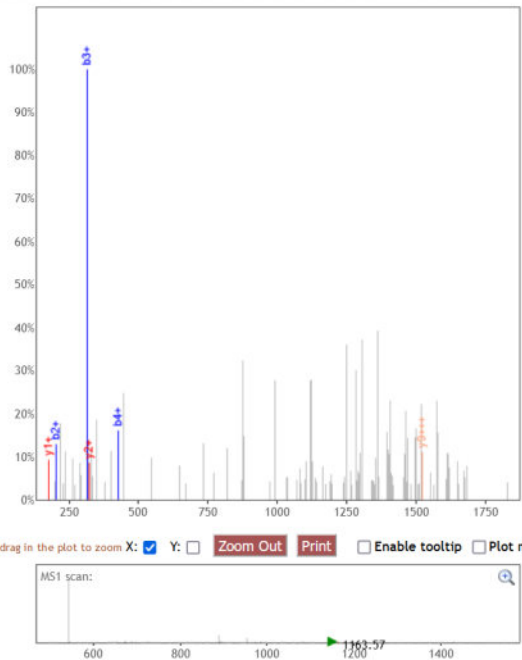

| b-        | b2+       | b3+       | #  | Seq # | y- | y2+       | y3+       |
|-----------|-----------|-----------|----|-------|----|-----------|-----------|
| 88.0393   | 44.5233   | 30.0180   | 1  | S     | 10 |           |           |
| 203.0662  | 102.0368  | 68.3603   | 2  | D     | 9  | 4563.2413 | 2282.1243 |
| 316.1503  | 158.5788  | 106.0550  | 3  | L     | 8  | 4448.2144 | 2224.6108 |
| 429.2344  | 215.1208  | 143.7496  | 4  | I     | 7  | 4335.1303 | 2168.0688 |
| 526.2871  | 263.6472  | 176.1006  | 5  | P     | 6  | 4222.0463 | 2111.5268 |
| 4087.9142 | 2044.4608 | 1363.3096 | 6  | T     | 5  | 4124.9935 | 2063.0004 |
| 4200.9983 | 2101.0028 | 1401.0043 | 7  | I     | 4  | 563.3664  | 282.1868  |
| 4329.0933 | 2165.0503 | 1443.7026 | 8  | K     | 3  | 450.2823  | 225.6448  |
| 4476.1617 | 2238.5845 | 1492.7254 | 9  | F     | 2  | 322.1874  | 161.5973  |
|           |           |           | 10 | R     | 1  | 175.1190  | 88.0631   |

Linked Peptide + Linker Mass: 3460.58  
Linker Mass: 138.06808

ISD TopBP11-766-strep (480) Psfl (63)

DFAPSEKHEQADEDLLSQYENGSSSTVVEAK

SDLIPTIKFR

DFAPSEKHEQADEDLLSQYENGSSSTVVEAK, MH+ 4650.2734, m/z 1163.3238

File: ACE\_0704\_BT01\_StageTip\_210min-calib.mzML, Scan: 45733, Exp. m/z: 1163.825097881888, Charge: 4

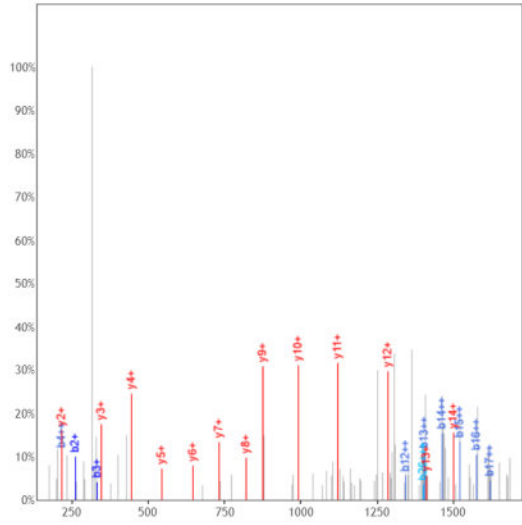

drag in the plot to zoom X:  Y:  [Zoom Out](#) [Print](#)  Enable tooltip  Plot mass error

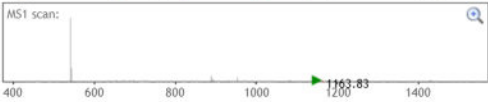

| b-        | b2-       | b3-       | #  | Seq # | y- | y2-       | y3-       |
|-----------|-----------|-----------|----|-------|----|-----------|-----------|
| 116.0342  | 58.5207   | 39.3496   | 1  | D     | 30 |           |           |
| 263.1024  | 132.0550  | 88.3724   | 2  | F     | 29 | 4535.2464 | 2268.1268 |
| 334.1397  | 167.5735  | 112.0514  | 3  | A     | 28 | 4388.1780 | 2194.5926 |
| 431.1925  | 216.0999  | 144.4024  | 4  | P     | 27 | 4317.1409 | 2159.0741 |
| 1844.9793 | 922.9933  | 615.6646  | 5  | S     | 26 | 4220.0881 | 2110.5477 |
| 1974.0219 | 987.5146  | 658.6788  | 6  | E     | 25 | 2806.3014 | 1403.6543 |
| 2102.1168 | 1051.5621 | 701.3771  | 7  | K     | 24 | 2677.2588 | 1339.1330 |
| 2239.1757 | 1120.0915 | 747.0634  | 8  | H     | 23 | 2549.1638 | 1275.0855 |
| 2368.2183 | 1184.6128 | 790.0776  | 9  | E     | 22 | 2412.1049 | 1206.5561 |
| 2496.2769 | 1248.6421 | 832.7638  | 10 | Q     | 21 | 2283.0623 | 1142.0348 |
| 2567.3140 | 1284.1607 | 856.4429  | 11 | A     | 20 | 2155.0037 | 1078.0055 |
| 2682.3410 | 1341.6741 | 894.7852  | 12 | D     | 19 | 2083.9666 | 1042.4869 |
| 2811.3836 | 1406.1954 | 937.7994  | 13 | E     | 18 | 1968.9397 | 984.9735  |
| 2926.4105 | 1463.7089 | 976.1417  | 14 | D     | 17 | 1839.8971 | 920.4522  |
| 3039.4946 | 1520.2509 | 1013.8364 | 15 | L     | 16 | 1724.8701 | 862.9387  |
| 3152.5786 | 1576.7930 | 1051.5311 | 16 | L     | 15 | 1611.7861 | 806.3967  |
| 3239.6107 | 1620.3090 | 1080.5417 | 17 | S     | 14 | 1490.7020 | 749.8546  |
| 3367.6692 | 1684.3383 | 1123.2279 | 18 | Q     | 13 | 1411.6700 | 706.3386  |
| 3530.7326 | 1765.8699 | 1177.5824 | 19 | Y     | 12 | 1283.6114 | 642.3093  |
| 3659.7752 | 1830.3912 | 1220.5966 | 20 | E     | 11 | 1120.5481 | 560.7777  |
| 3773.8181 | 1887.4127 | 1258.6109 | 21 | N     | 10 | 991.5055  | 496.2564  |
| 3830.8396 | 1915.9234 | 1277.6180 | 22 | G     | 9  | 877.4625  | 439.2349  |
| 3917.8716 | 1959.4394 | 1306.6287 | 23 | S     | 8  | 820.4411  | 410.7242  |
| 4004.9036 | 2002.9554 | 1335.6394 | 24 | S     | 7  | 733.4090  | 367.2082  |
| 4105.9513 | 2053.4793 | 1369.3219 | 25 | T     | 6  | 646.3770  | 323.6921  |
| 4205.0197 | 2103.0135 | 1402.3448 | 26 | V     | 5  | 545.3293  | 273.1683  |
| 4304.0881 | 2152.5477 | 1435.3676 | 27 | V     | 4  | 446.2609  | 223.6341  |
| 4433.1387 | 2217.0690 | 1478.3818 | 28 | E     | 3  | 347.1925  | 174.0999  |
| 4504.1678 | 2252.5876 | 1502.0608 | 29 | A     | 2  | 218.1499  | 109.5786  |
|           |           |           | 30 | K     | 1  | 147.1128  | 74.0600   |

[\[Click\]](#) to move table  
**Linked Peptide + Linker Mass: 1326.75**  
**Linker Mass: 138.06808**

SDLIPTIKFR, MH+ 4650.2734, m/z 1163.3238

File: ACE\_0704\_BT01\_StageTip\_210min-calib.mzML, Scan: 45733, Exp. m/z: 1163.825097881888, Charge: 4

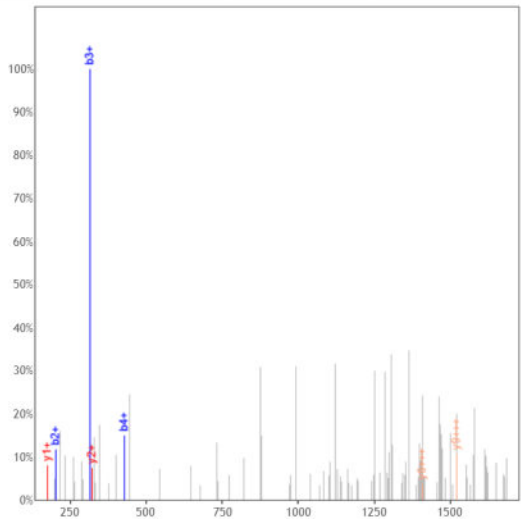

drag in the plot to zoom X:  Y:  [Zoom Out](#) [Print](#)  Enable tooltip  Plot mass error

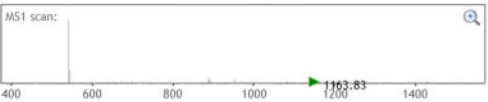

| b-        | b2-       | b3-       | #  | Seq # | y- | y2-       | y3-       |
|-----------|-----------|-----------|----|-------|----|-----------|-----------|
| 88.0393   | 44.5233   | 30.0180   | 1  | S     | 10 |           |           |
| 203.0662  | 102.0368  | 68.3603   | 2  | D     | 9  | 4563.2413 | 2282.1243 |
| 316.1503  | 158.5788  | 106.0550  | 3  | L     | 8  | 4448.2144 | 2224.6108 |
| 429.2244  | 215.1208  | 143.7496  | 4  | I     | 7  | 4335.1303 | 2168.0688 |
| 526.2871  | 263.6472  | 176.1006  | 5  | P     | 6  | 4222.0463 | 2111.5268 |
| 627.3348  | 314.1710  | 209.7831  | 6  | T     | 5  | 4124.9935 | 2063.0004 |
| 740.4189  | 370.7131  | 247.4778  | 7  | I     | 4  | 4023.9458 | 2012.4765 |
| 4329.0933 | 2165.0503 | 1443.7026 | 8  | R     | 3  | 3910.8617 | 1955.9345 |
| 4476.1617 | 2238.5845 | 1492.7254 | 9  | F     | 2  | 322.1874  | 161.5973  |
|           |           |           | 10 | R     | 1  | 175.1190  | 88.0631   |

[\[Click\]](#) to move table  
**Linked Peptide + Linker Mass: 3460.58**  
**Linker Mass: 138.06808**



ISD TopBP11-766-strep (475) Psfl (63)

KDFAPSEK

|

SDLIPTIKFR

**KDFAPSEK**, MH+ 2248.2223, m/z 562.8110

File: ACE\_0704\_BT01\_StageTip\_210min.mzML, Scan: 33941, Exp. m/z: 562.811157226563, Charge: 4

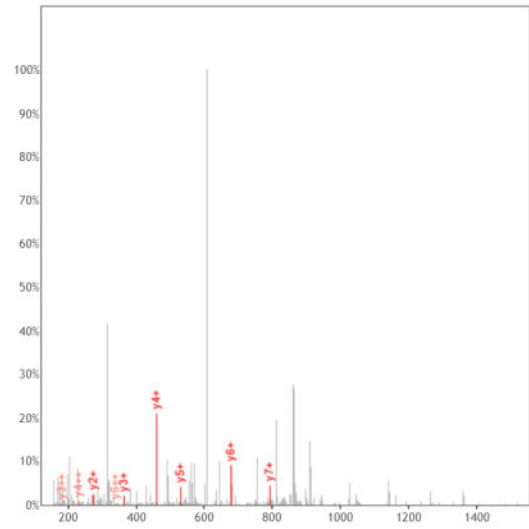

frag in the plot to zoom X:  Y:  [Zoom Out](#) [Print](#)  Enable tooltip  Plot mass error

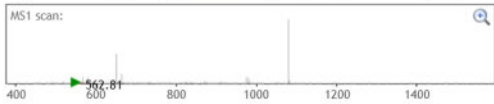

| b-        | b2-       | b3-      | # | Seq # | y-       | y2-      | y3-      |
|-----------|-----------|----------|---|-------|----------|----------|----------|
| 1455.8569 | 728.4321  | 485.9571 | 1 | K 8   |          |          |          |
| 1570.8838 | 785.9456  | 524.2995 | 2 | D 7   | 793.3727 | 397.1900 | 265.1291 |
| 1717.9523 | 859.4798  | 573.3223 | 3 | F 6   | 678.3457 | 339.6765 | 226.7868 |
| 1788.9894 | 894.9983  | 597.0013 | 4 | A 5   | 531.2773 | 266.1423 | 177.7640 |
| 1886.0421 | 943.5247  | 629.3522 | 5 | P 4   | 460.2402 | 230.6237 | 154.0849 |
| 1973.0742 | 987.0407  | 658.3629 | 6 | S 3   | 363.1874 | 182.0974 | 121.7340 |
| 2102.1168 | 1051.5620 | 701.3771 | 7 | E 2   | 276.1554 | 138.5813 | 92.7233  |
|           |           |          | 8 | K 1   | 147.1128 | 74.0600  | 49.7091  |

[Click](#) to move table

Static Modifications:

C: 57.0215

Linked Peptide + Linker Mass: 1326.75

Linker Mass: 138.068

**SDLIPTIKFR**, MH+ 2248.2223, m/z 562.8110

File: ACE\_0704\_BT01\_StageTip\_210min.mzML, Scan: 33941, Exp. m/z: 562.811157226563, Charge: 4

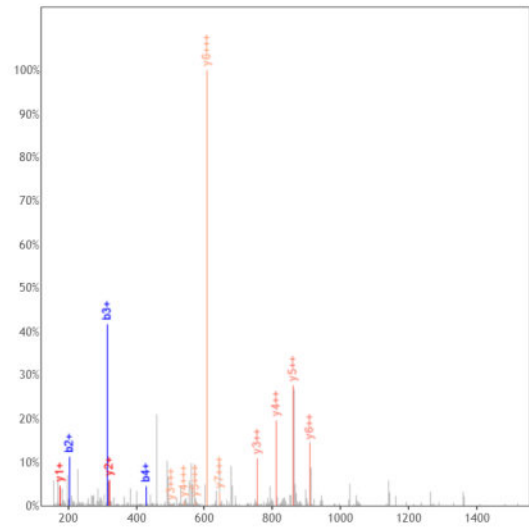

frag in the plot to zoom X:  Y:  [Zoom Out](#) [Print](#)  Enable tooltip  Plot mass error

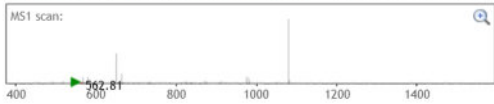

| b-        | b2-       | b3-      | #  | Seq # | y-        | y2-       | y3-      |
|-----------|-----------|----------|----|-------|-----------|-----------|----------|
| 88.0393   | 44.5233   | 30.0180  | 1  | S 10  |           |           |          |
| 203.0662  | 102.0368  | 68.3603  | 2  | D 9   | 2161.1903 | 1081.0988 | 721.0683 |
| 316.1503  | 158.5788  | 106.0550 | 3  | L 8   | 2046.1633 | 1023.5853 | 682.7260 |
| 429.2344  | 215.1208  | 143.7496 | 4  | I 7   | 1933.0792 | 967.0433  | 645.0313 |
| 526.2871  | 263.6472  | 176.1006 | 5  | P 6   | 1819.9952 | 910.5012  | 607.3366 |
| 627.3348  | 314.1710  | 209.7831 | 6  | T 5   | 1722.9424 | 861.9748  | 574.9057 |
| 740.4189  | 370.7131  | 247.4778 | 7  | I 4   | 1621.8947 | 811.4510  | 541.3031 |
| 1927.0422 | 964.0247  | 643.0189 | 8  | K 3   | 1508.8107 | 754.9090  | 503.6084 |
| 2074.1106 | 1037.5589 | 692.0417 | 9  | F 2   | 322.1874  | 161.5973  | 108.0673 |
|           |           |          | 10 | R 1   | 175.1190  | 88.0631   | 59.0445  |

[Click](#) to move table

Static Modifications:

C: 57.0215

Linked Peptide + Linker Mass: 1058.53

Linker Mass: 138.068

ISD TopBP11-766-strep (468) Psfl (63)

KNSSFSK

|

SDLTIKFR

**KNSSFSK**, MH+ 2124.1699, m/z 708.7281

File: ACE\_0704\_BT01\_StageTip\_210min.mzML, Scan: 29534, Exp. m/z: 708.728637695313, Charge: 3

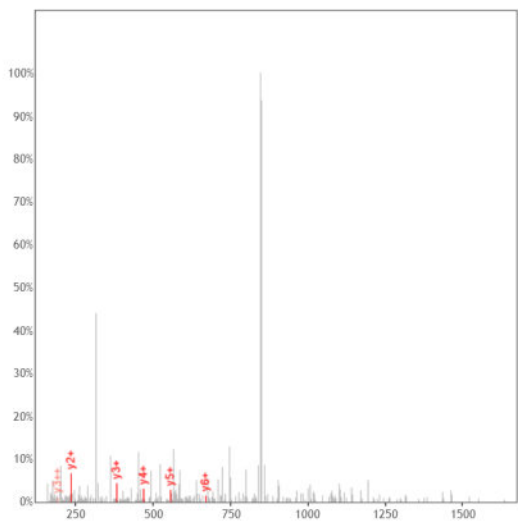

and drag in the plot to zoom X:  Y:  **Zoom Out** **Print**  Enable tooltip  Plot mass error

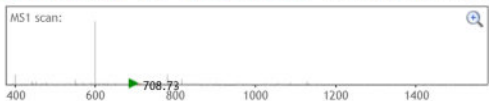

| b <sup>+</sup> | b <sup>2+</sup> | # | Seq # | y <sup>-</sup> | y <sup>2-</sup> |
|----------------|-----------------|---|-------|----------------|-----------------|
| 1455.8569      | 728.4321        | 1 | K     | 7              |                 |
| 1569.8998      | 785.4536        | 2 | N     | 6              | 669.3202        |
| 1656.9319      | 828.9696        | 3 | S     | 5              | 955.2773        |
| 1743.9639      | 872.4856        | 4 | S     | 4              | 468.2453        |
| 1891.0323      | 946.0198        | 5 | F     | 3              | 381.2132        |
| 1978.0643      | 989.5358        | 6 | S     | 2              | 234.1448        |
|                |                 | 7 | K     | 1              | 147.1128        |
|                |                 |   |       |                | 74.0600         |

[\[Click\]](#) to move table

Static Modifications:  
C: 57.0215

Linked Peptide + Linker Mass: 1326.75

Linker Mass: 138.068

**SDLTIKFR**, MH+ 2124.1699, m/z 708.7281

File: ACE\_0704\_BT01\_StageTip\_210min.mzML, Scan: 29534, Exp. m/z: 708.728637695313, Charge: 3

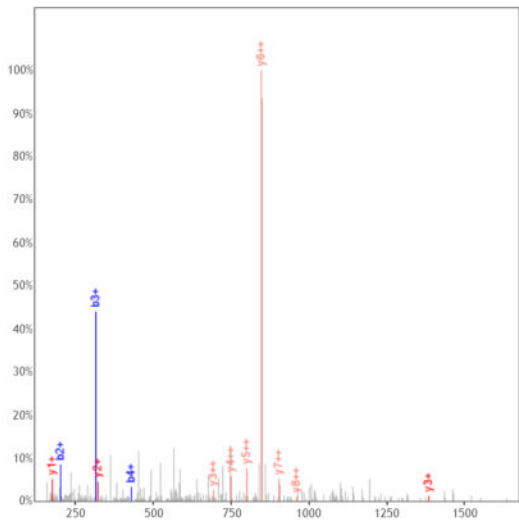

and drag in the plot to zoom X:  Y:  **Zoom Out** **Print**  Enable tooltip  Plot mass error

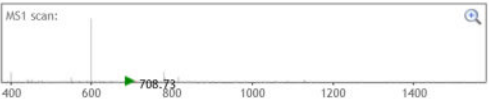

| b <sup>+</sup> | b <sup>2+</sup> | #  | Seq # | y <sup>-</sup> | y <sup>2-</sup> |
|----------------|-----------------|----|-------|----------------|-----------------|
| 88.0393        | 44.5233         | 1  | S     | 10             |                 |
| 203.0662       | 102.0368        | 2  | D     | 9              | 2037.1378       |
| 316.1503       | 158.5788        | 3  | L     | 8              | 1922.1109       |
| 429.2344       | 215.1208        | 4  | I     | 7              | 1809.0268       |
| 526.2871       | 263.6472        | 5  | P     | 6              | 1695.9428       |
| 627.3348       | 314.1710        | 6  | T     | 5              | 1598.8900       |
| 740.4189       | 370.7131        | 7  | I     | 4              | 1497.8423       |
| 1802.9898      | 901.9985        | 8  | K     | 3              | 1384.7582       |
| 1950.0582      | 975.5327        | 9  | F     | 2              | 322.1874        |
|                |                 | 10 | R     | 1              | 175.1190        |
|                |                 |    |       |                | 88.0631         |

[\[Click\]](#) to move table

Static Modifications:  
C: 57.0215

Linked Peptide + Linker Mass: 934.48

Linker Mass: 138.068

ISD TopBP11-766-strep (466) Psfl (63)

AALLKK

|

SDLIPTIKFR

**AALLKK**, MH+ 1970.2048, m/z 493.3067

File: ACE\_0704\_BT01\_StageTip\_210min.mzML, Scan: 35956, Exp. m/z: 493.306823730469, Charge: 4

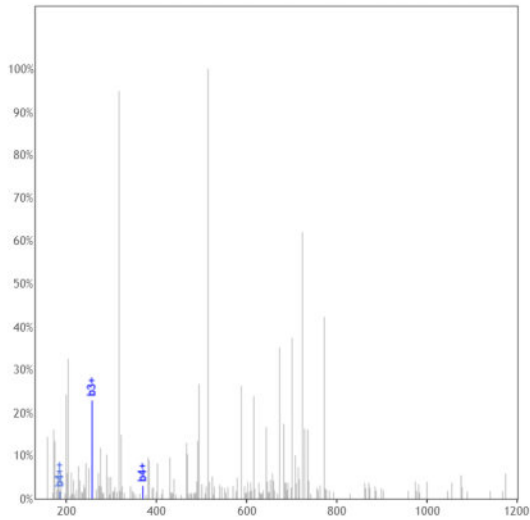

Click and drag in the plot to zoom X:  Y:  **Zoom Out** **Print**  
 Enable tooltip  Plot mass error

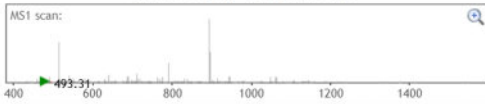

| b+        | b2+      | b3+      | # | Seq # | y+        | y2+      | y3+      |
|-----------|----------|----------|---|-------|-----------|----------|----------|
| 72.0444   | 36.5258  | 24.6863  | 1 | A 6   |           |          |          |
| 143.0815  | 72.0444  | 48.3654  | 2 | A 5   | 1899.1677 | 950.0875 | 633.7274 |
| 256.1656  | 128.5864 | 86.0600  | 3 | L 4   | 1828.1306 | 914.5689 | 610.0484 |
| 369.2496  | 185.1285 | 123.7547 | 4 | L 3   | 1715.0465 | 858.0269 | 572.3537 |
| 1824.0993 | 912.5533 | 608.7046 | 5 | K 2   | 1601.9624 | 801.4849 | 534.6590 |
|           |          |          | 6 | K 1   | 147.1128  | 74.0600  | 49.7091  |

[\[Click\]](#) to move table  
**Static Modifications:**  
**C: 57.0215**  
**Linked Peptide + Linker Mass: 1326.75**  
**Linker Mass: 138.068**

**SDLIPTIKFR**, MH+ 1970.2048, m/z 493.3067

File: ACE\_0704\_BT01\_StageTip\_210min.mzML, Scan: 35956, Exp. m/z: 493.306823730469, Charge: 4

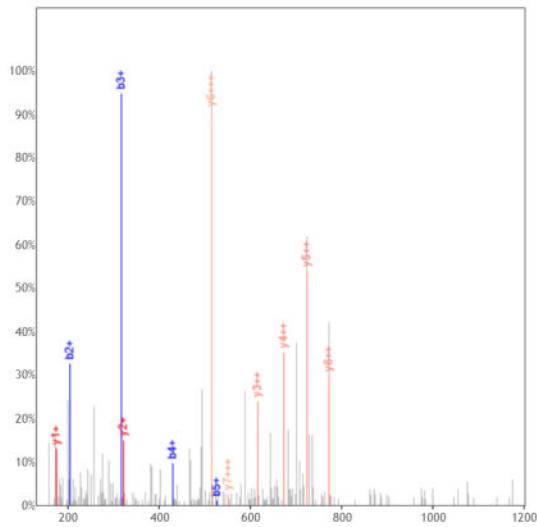

Click and drag in the plot to zoom X:  Y:  **Zoom Out** **Print**  
 Enable tooltip  Plot mass error

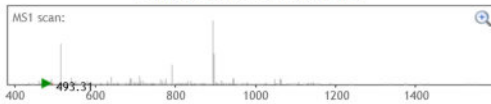

| b+        | b2+      | b3+      | #  | Seq # | y+        | y2+      | y3+      |
|-----------|----------|----------|----|-------|-----------|----------|----------|
| 88.0393   | 44.5233  | 30.0180  | 1  | S 10  |           |          |          |
| 203.0662  | 102.0368 | 68.3603  | 2  | D 9   | 1883.1728 | 942.0900 | 628.3958 |
| 316.1503  | 158.5788 | 106.0550 | 3  | L 8   | 1768.1458 | 884.5765 | 590.0535 |
| 429.2344  | 215.1208 | 143.7496 | 4  | I 7   | 1655.0617 | 828.0345 | 552.3388 |
| 526.2871  | 263.6472 | 176.1006 | 5  | P 6   | 1541.9777 | 771.4925 | 514.6641 |
| 627.3348  | 314.1710 | 209.7831 | 6  | T 5   | 1444.9249 | 722.9661 | 482.3132 |
| 740.4189  | 370.7131 | 247.4778 | 7  | I 4   | 1343.8772 | 672.4423 | 448.6306 |
| 1649.0247 | 825.0160 | 550.3464 | 8  | K 3   | 1230.7932 | 615.9002 | 410.9359 |
| 1796.0931 | 898.5502 | 599.3692 | 9  | F 2   | 322.1874  | 161.5973 | 108.0673 |
|           |          |          | 10 | R 1   | 175.1190  | 88.0631  | 59.0445  |

[\[Click\]](#) to move table  
**Static Modifications:**  
**C: 57.0215**  
**Linked Peptide + Linker Mass: 780.51**  
**Linker Mass: 138.068**

IGD TopBP11-766-strep (475) PsfIII (80)

GLFDNKR

|  
KDFAPSEK

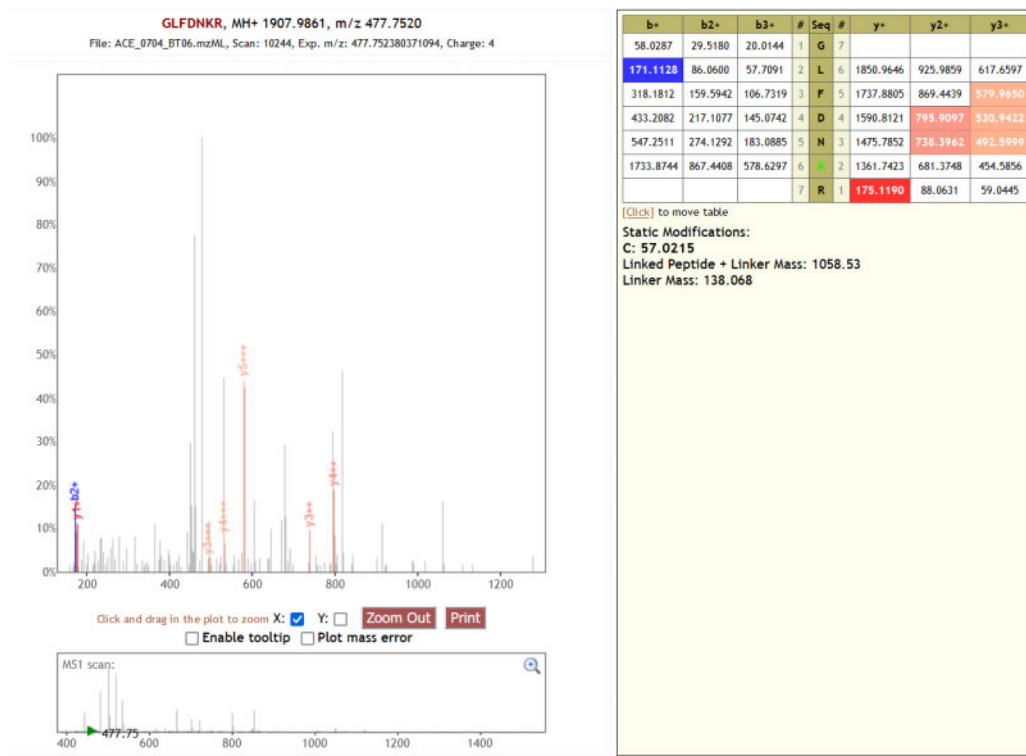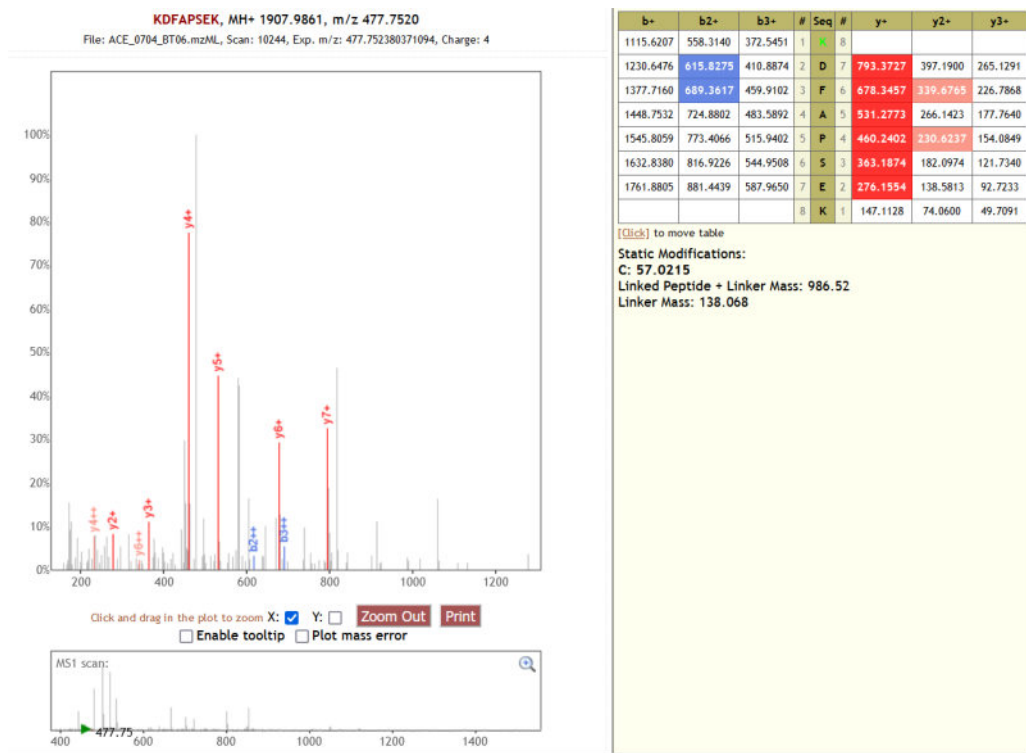

IGD TopBP11-766-strep (474) PsfIII (80)

GLFDNKR

|

NSSFSKK

**GLFDNKR**, MH+ 1783.9336, m/z 595.3161

File: ACE\_0704\_BT06.mzML, Scan: 9156, Exp. m/z: 595.316101074219, Charge: 3

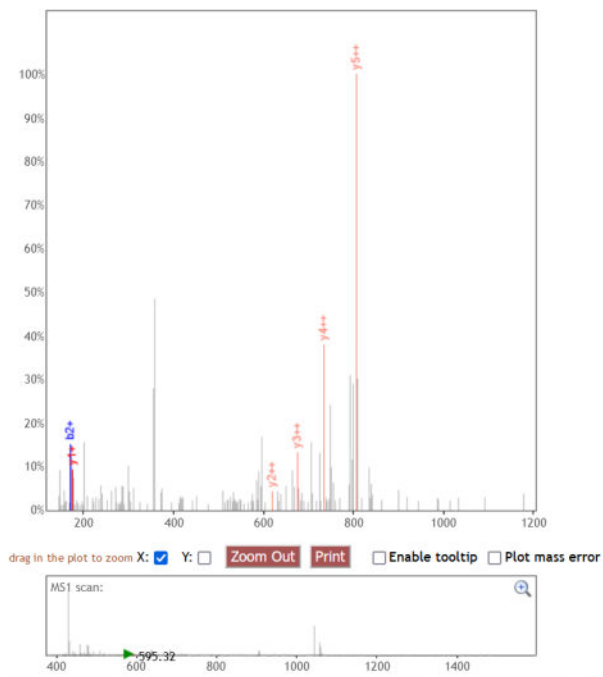

| b+              | b2+      | # | Seq # | y+              | y2+      |
|-----------------|----------|---|-------|-----------------|----------|
| 58.0287         | 29.5180  | 1 | G 7   |                 |          |
| <b>171.1128</b> | 86.0600  | 2 | L 6   | 1726.9122       | 863.9597 |
| 318.1812        | 159.5942 | 3 | F 5   | 1613.8281       | 807.4177 |
| 433.2082        | 217.1077 | 4 | D 4   | 1466.7597       | 733.8535 |
| 547.2511        | 274.1292 | 5 | N 3   | 1351.7328       | 676.3700 |
| 1609.8220       | 805.4146 | 6 | K 2   | 1237.6898       | 619.3486 |
|                 |          | 7 | R 1   | <b>175.1190</b> | 88.0631  |

[\[Click\]](#) to move table

Static Modifications:

C: 57.0215

Linked Peptide + Linker Mass: 934.48

Linker Mass: 138.068

**NSSFSKK**, MH+ 1783.9336, m/z 595.3161

File: ACE\_0704\_BT06.mzML, Scan: 9156, Exp. m/z: 595.316101074219, Charge: 3

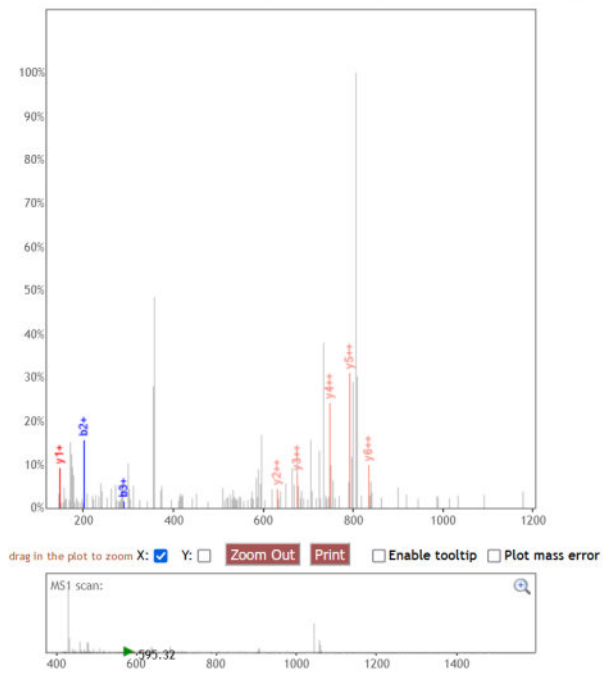

| b+              | b2+      | # | Seq # | y+              | y2+      |
|-----------------|----------|---|-------|-----------------|----------|
| 115.0502        | 58.0287  | 1 | N 7   |                 |          |
| 202.0822        | 101.5448 | 2 | S 6   | 1669.8907       | 835.4490 |
| <b>289.1143</b> | 145.0608 | 3 | S 5   | 1582.8587       | 791.9330 |
| 436.1827        | 218.5950 | 4 | F 4   | 1495.8267       | 748.4170 |
| 523.2147        | 262.1110 | 5 | S 3   | 1348.7582       | 674.6028 |
| 1637.8281       | 819.4177 | 6 | K 2   | 1261.7262       | 631.3667 |
|                 |          | 7 | K 1   | <b>147.1128</b> | 74.0600  |

[\[Click\]](#) to move table

Static Modifications:

C: 57.0215

Linked Peptide + Linker Mass: 986.52

Linker Mass: 138.068

IGD TopBP11-766-strep (473) PsfIII (80)

GLFDNKR

NSSFSKK

**GLFDNKR**, MH+ 1783.9336, m/z 595.3161

File: ACE\_0704\_BT05.mzML, Scan: 9151, Exp. m/z: 595.316223144531, Charge: 3

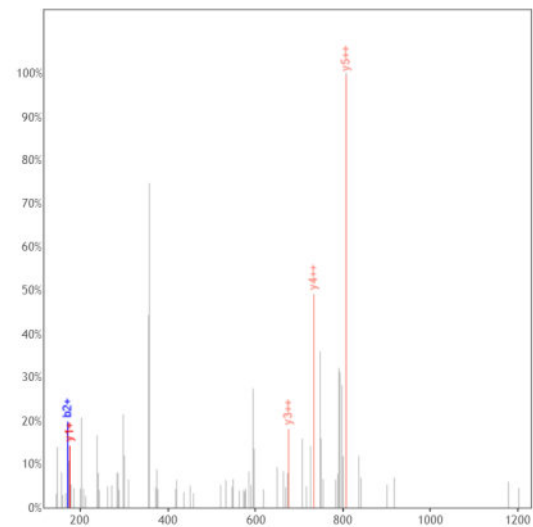

drag in the plot to zoom X:  Y:  [Zoom Out](#) [Print](#)  Enable tooltip  Plot mass error

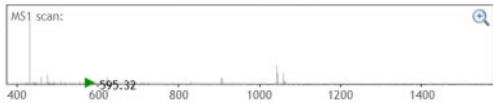

| b+        | b2+      | # | Seq # | y+        | y2+      |
|-----------|----------|---|-------|-----------|----------|
| 58.0287   | 29.5180  | 1 | G 7   |           |          |
| 171.1128  | 86.0600  | 2 | L 6   | 1726.9122 | 863.9597 |
| 318.1812  | 159.5942 | 3 | F 5   | 1613.8281 | 807.4177 |
| 433.2082  | 217.1077 | 4 | D 4   | 1466.7597 | 733.8835 |
| 547.2511  | 274.1292 | 5 | N 3   | 1351.7328 | 676.3700 |
| 1609.8220 | 805.4146 | 6 | K 2   | 1237.6898 | 619.3486 |
|           |          | 7 | R 1   | 175.1190  | 88.0631  |

[\[Click\]](#) to move table

Static Modifications:

C: 57.0215

Linked Peptide + Linker Mass: 934.48

Linker Mass: 138.068

**NSSFSKK**, MH+ 1783.9336, m/z 595.3161

File: ACE\_0704\_BT05.mzML, Scan: 9151, Exp. m/z: 595.316223144531, Charge: 3

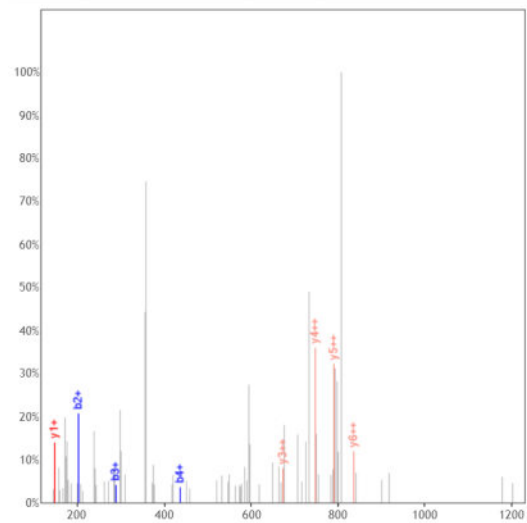

drag in the plot to zoom X:  Y:  [Zoom Out](#) [Print](#)  Enable tooltip  Plot mass error

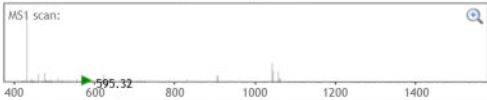

| b+        | b2+      | # | Seq # | y+        | y2+      |
|-----------|----------|---|-------|-----------|----------|
| 115.0502  | 58.0287  | 1 | N 7   |           |          |
| 202.0822  | 101.5448 | 2 | S 6   | 1669.8907 | 835.4490 |
| 289.1143  | 145.0608 | 3 | S 5   | 1582.8587 | 791.9330 |
| 436.1827  | 218.5950 | 4 | F 4   | 1495.8267 | 748.4170 |
| 1509.7332 | 755.3702 | 5 | S 3   | 1348.7582 | 674.8828 |
| 1637.8281 | 819.4177 | 6 | K 2   | 275.2078  | 138.1075 |
|           |          | 7 | K 1   | 147.1128  | 74.0600  |

[\[Click\]](#) to move table

Static Modifications:

C: 57.0215

Linked Peptide + Linker Mass: 986.52

Linker Mass: 138.068

IGD TopBP11-766-strep (468) PsfIII (80)

GLFDNKR

|  
KNSSFSK

**GLFDNKR, MH+ 1783.9336, m/z 595.3161**

File: ACE\_0704\_BT05.mzML, Scan: 8482, Exp. m/z: 595.315673828125, Charge: 3

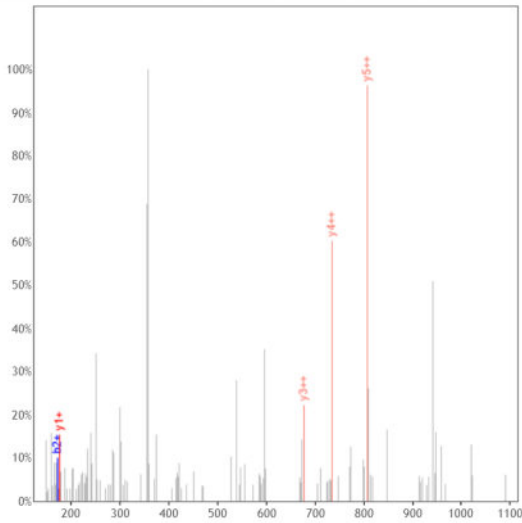

drag in the plot to zoom X:  Y:  [Zoom Out](#) [Print](#)  Enable tooltip  Plot mass error

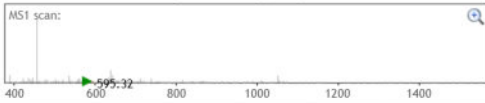

| b-        | b2-      | # | Seq # | y-        | y2-      |
|-----------|----------|---|-------|-----------|----------|
| 58.0287   | 29.5180  | 1 | G 7   |           |          |
| 171.1128  | 86.0600  | 2 | L 6   | 1726.9122 | 863.9597 |
| 318.1812  | 159.5942 | 3 | F 5   | 1613.8281 | 807.4177 |
| 433.2082  | 217.1077 | 4 | D 4   | 1466.7597 | 733.8835 |
| 547.2511  | 274.1292 | 5 | N 3   | 1351.7328 | 676.3700 |
| 1609.8220 | 805.4146 | 6 | K 2   | 1237.6898 | 619.3486 |
|           |          | 7 | R 1   | 175.1190  | 88.0631  |

[\[Click\]](#) to move table

Static Modifications:

C: 57.0215

Linked Peptide + Linker Mass: 934.48

Linker Mass: 138.068

**KNSSFSK, MH+ 1783.9336, m/z 595.3161**

File: ACE\_0704\_BT05.mzML, Scan: 8482, Exp. m/z: 595.315673828125, Charge: 3

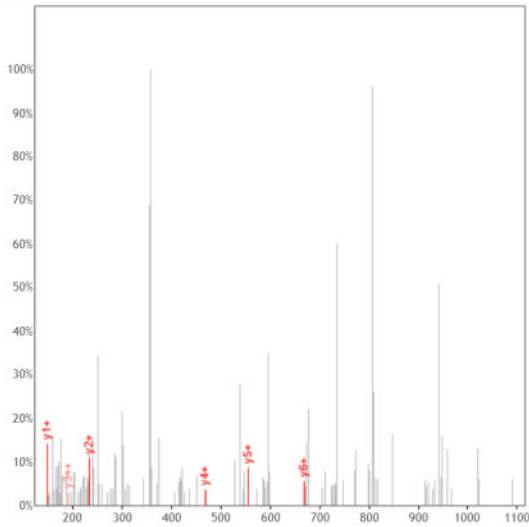

drag in the plot to zoom X:  Y:  [Zoom Out](#) [Print](#)  Enable tooltip  Plot mass error

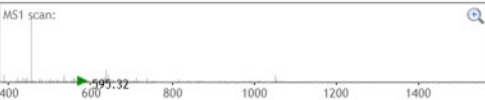

| b-        | b2-      | # | Seq # | y-       | y2-      |
|-----------|----------|---|-------|----------|----------|
| 1115.6207 | 558.3140 | 1 | K 7   |          |          |
| 1229.6636 | 615.3354 | 2 | N 6   | 649.3202 | 335.1638 |
| 1316.6956 | 658.8515 | 3 | S 5   | 555.2773 | 278.1423 |
| 1403.7277 | 702.3675 | 4 | S 4   | 468.2453 | 234.6263 |
| 1550.7961 | 775.9017 | 5 | F 3   | 381.2132 | 191.1103 |
| 1637.8281 | 819.4177 | 6 | S 2   | 234.1448 | 117.5761 |
|           |          | 7 | K 1   | 147.1128 | 74.0600  |

[\[Click\]](#) to move table

Static Modifications:

C: 57.0215

Linked Peptide + Linker Mass: 986.52

Linker Mass: 138.068

IGD TopBP11-766-strep (466) PsfIII (80)

AALLKK

|

GLFDNKR

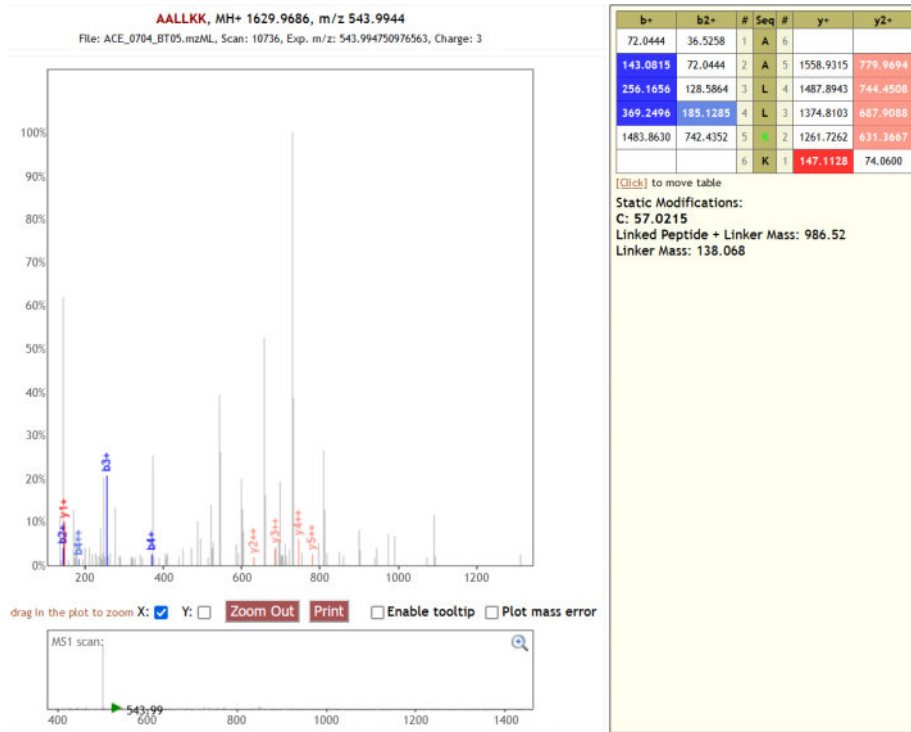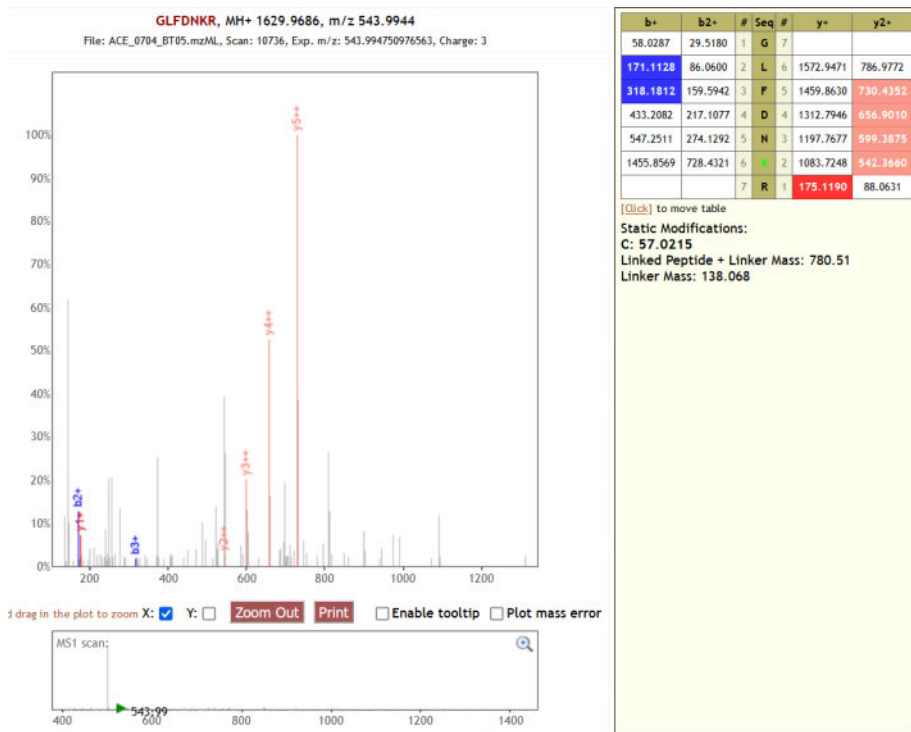



ISD TopBP11-766-strep (480) PsfIII (80)

DFAPSEK

|

GLFDNKR

**DFAPSEK, MH+ 1779.8911, m/z 593.9686**

File: ACE\_0704\_BT01\_StageTip\_210min.mzML, Scan: 22561, Exp. m/z: 593.968200683594, Charge: 3

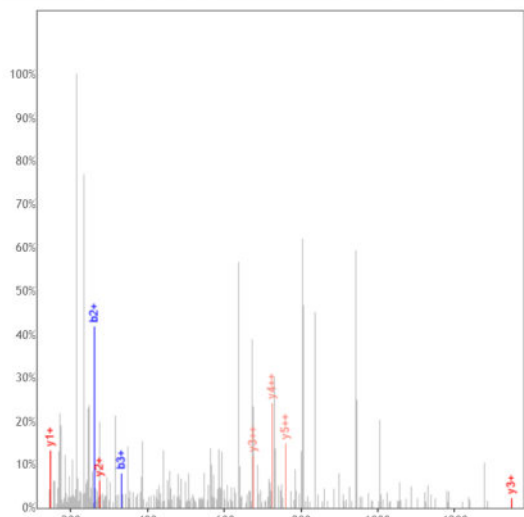

Click and drag in the plot to zoom X:  Y:  **Zoom Out** **Print**  
 Enable tooltip  Plot mass error

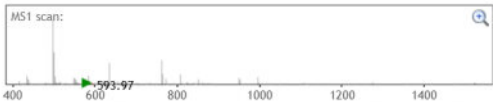

| b-        | b2+      | # | Seq | # | y+        | y2+      |
|-----------|----------|---|-----|---|-----------|----------|
| 116.0342  | 58.5207  | 1 | D   | 7 |           |          |
| 243.1024  | 132.0550 | 2 | F   | 6 | 1664.8642 | 832.9357 |
| 334.1397  | 167.5735 | 3 | A   | 5 | 1517.7958 | 759.4015 |
| 431.1925  | 216.0999 | 4 | P   | 4 | 1446.7586 | 723.8830 |
| 1504.7430 | 752.8751 | 5 | S   | 3 | 1349.7059 | 675.3566 |
| 1633.7856 | 817.3964 | 6 | E   | 2 | 276.1554  | 138.5813 |
|           |          | 7 | K   | 1 | 147.1128  | 74.0600  |

[\[Click\]](#) to move table

Static Modifications:  
 C: 57.0215  
 Linked Peptide + Linker Mass: 986.52  
 Linker Mass: 138.068

**GLFDNKR, MH+ 1779.8911, m/z 593.9686**

File: ACE\_0704\_BT01\_StageTip\_210min.mzML, Scan: 22561, Exp. m/z: 593.968200683594, Charge: 3

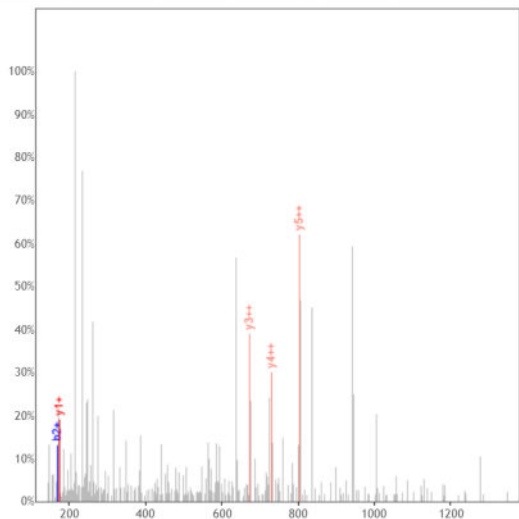

Click and drag in the plot to zoom X:  Y:  **Zoom Out** **Print**  
 Enable tooltip  Plot mass error

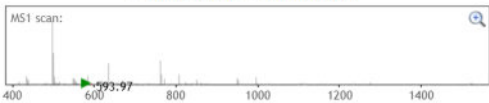

| b-        | b2+      | # | Seq | # | y+        | y2+      |
|-----------|----------|---|-----|---|-----------|----------|
| 58.0287   | 29.5180  | 1 | G   | 7 |           |          |
| 171.1128  | 86.0600  | 2 | L   | 6 | 1722.8696 | 861.9385 |
| 318.1812  | 159.5942 | 3 | F   | 5 | 1609.7856 | 805.3944 |
| 433.2082  | 217.1077 | 4 | D   | 4 | 1462.7172 | 731.8622 |
| 547.2511  | 274.1292 | 5 | N   | 3 | 1347.6902 | 674.3468 |
| 1605.7794 | 803.3934 | 6 | K   | 2 | 1233.6473 | 617.3273 |
|           |          | 7 | R   | 1 | 175.1190  | 88.0631  |

[\[Click\]](#) to move table

Static Modifications:  
 C: 57.0215  
 Linked Peptide + Linker Mass: 930.43  
 Linker Mass: 138.068

ISD TopBP11-766-strep (475) PsfIII (80)

GLFDNKR

|  
KDFAPSEK

**GLFDNKR**, MH+ 1907.9861, m/z 636.6669

File: ACE\_0704\_BT01\_StageTip\_210min.mzML, Scan: 21105, Exp. m/z: 636.666381835938, Charge: 3

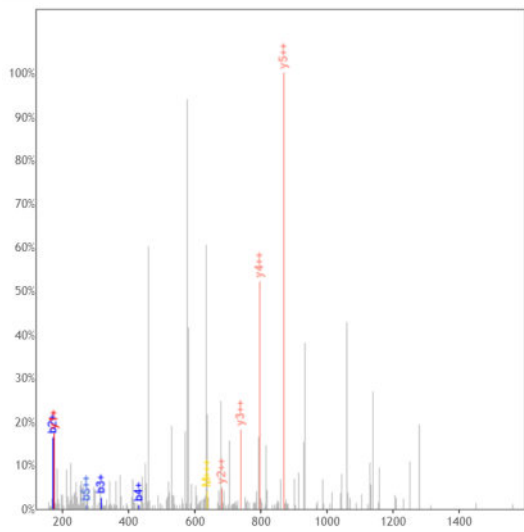

Click and drag in the plot to zoom X:  Y:  **Zoom Out** **Print**

Enable tooltip  Plot mass error

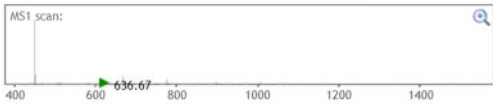

| b+        | b2+      | # | Seq # | y+        | y2+      |
|-----------|----------|---|-------|-----------|----------|
| 58.0287   | 29.5180  | 1 | G 7   |           |          |
| 171.1128  | 86.0600  | 2 | L 6   | 1850.9646 | 925.9859 |
| 318.1812  | 159.5942 | 3 | F 5   | 1737.8805 | 869.4439 |
| 433.2082  | 217.1077 | 4 | D 4   | 1590.8121 | 795.8097 |
| 547.2511  | 274.1292 | 5 | N 3   | 1475.7852 | 738.3962 |
| 1733.8744 | 867.4408 | 6 | K 2   | 1361.7423 | 681.3748 |
|           |          | 7 | R 1   | 175.1190  | 88.0631  |

[\[Click\]](#) to move table

Static Modifications:

C: 57.0215

Linked Peptide + Linker Mass: 1058.53

Linker Mass: 138.068

**KDFAPSEK**, MH+ 1907.9861, m/z 636.6669

File: ACE\_0704\_BT01\_StageTip\_210min.mzML, Scan: 21105, Exp. m/z: 636.666381835938, Charge: 3

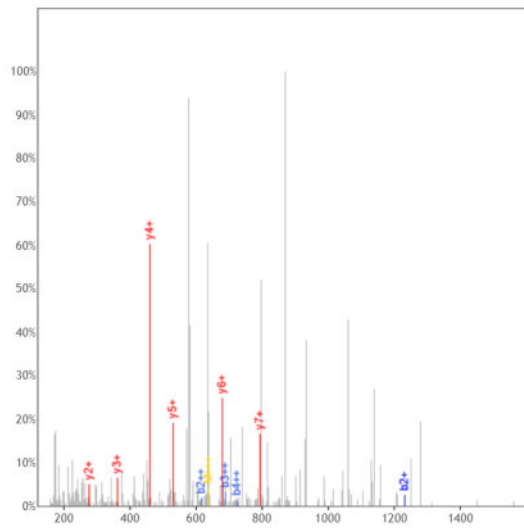

Click and drag in the plot to zoom X:  Y:  **Zoom Out** **Print**

Enable tooltip  Plot mass error

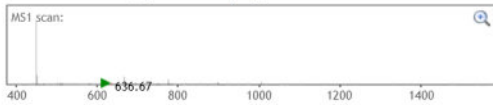

| b+        | b2+      | # | Seq # | y+       | y2+      |
|-----------|----------|---|-------|----------|----------|
| 1115.6207 | 558.3140 | 1 | K 8   |          |          |
| 1230.6476 | 615.8275 | 2 | D 7   | 793.3727 | 397.1900 |
| 1377.7160 | 689.3617 | 3 | F 6   | 678.3457 | 339.6765 |
| 1448.7532 | 724.8802 | 4 | A 5   | 531.2773 | 266.1423 |
| 1545.8059 | 773.4066 | 5 | P 4   | 460.2402 | 230.6237 |
| 1632.8380 | 816.9226 | 6 | S 3   | 363.1874 | 182.0974 |
| 1761.8805 | 881.4439 | 7 | E 2   | 276.1554 | 138.5813 |
|           |          | 8 | K 1   | 147.1128 | 74.0600  |

[\[Click\]](#) to move table

Static Modifications:

C: 57.0215

Linked Peptide + Linker Mass: 986.52

Linker Mass: 138.068

ISD TopBP11-766-strep (474) PsfIII (80)

GLFDNKR

|

NSSFSKK

**GLFDNKR**, MH+ 1783.9336, m/z 595.3161

File: ACE\_0704\_BT01\_StageTip\_210min.mzML, Scan: 17827, Exp. m/z: 595.31591796875, Charge: 3

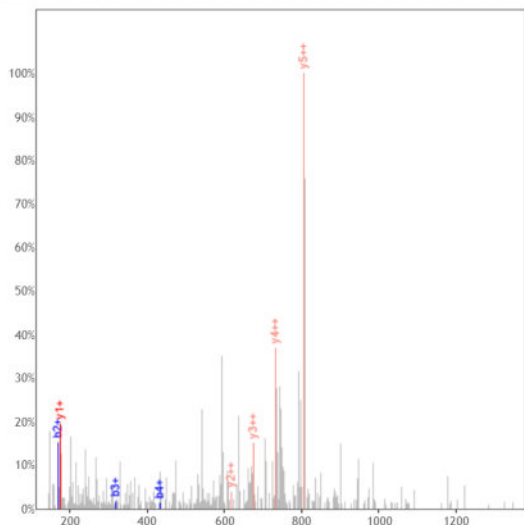

Click and drag in the plot to zoom X:  Y:  **Zoom Out** **Print**

Enable tooltip  Plot mass error

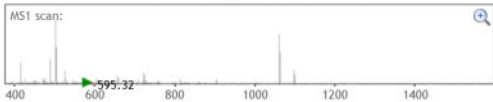

| b+        | b2+      | # | Seq # | y+        | y2+      |
|-----------|----------|---|-------|-----------|----------|
| 58.0287   | 29.5180  | 1 | G 7   |           |          |
| 171.1128  | 86.0600  | 2 | L 6   | 1726.9122 | 863.9597 |
| 318.1812  | 159.5942 | 3 | F 5   | 1613.8281 | 807.4177 |
| 433.2082  | 217.1077 | 4 | D 4   | 1466.7597 | 733.8835 |
| 547.2511  | 274.1292 | 5 | N 3   | 1351.7328 | 676.3700 |
| 1609.8220 | 805.4146 | 6 | K 2   | 1237.6898 | 619.3484 |
|           |          | 7 | R 1   | 175.1190  | 88.0631  |

[\[Click\]](#) to move table

Static Modifications:  
C: 57.0215  
Linked Peptide + Linker Mass: 934.48  
Linker Mass: 138.068

**NSSFSKK**, MH+ 1783.9336, m/z 595.3161

File: ACE\_0704\_BT01\_StageTip\_210min.mzML, Scan: 17827, Exp. m/z: 595.31591796875, Charge: 3

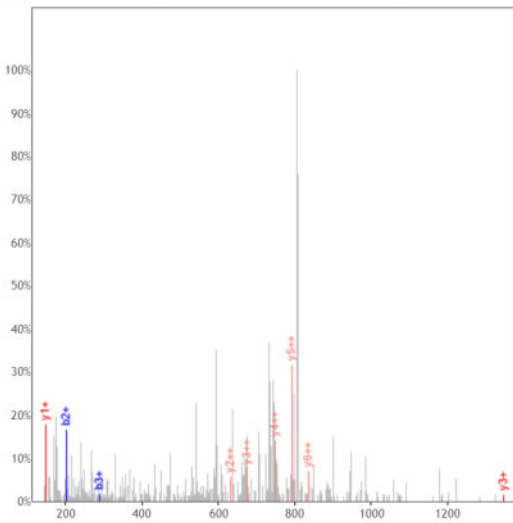

Click and drag in the plot to zoom X:  Y:  **Zoom Out** **Print**

Enable tooltip  Plot mass error

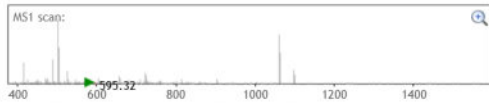

| b+        | b2+      | # | Seq # | y+        | y2+      |
|-----------|----------|---|-------|-----------|----------|
| 115.0502  | 58.0287  | 1 | N 7   |           |          |
| 202.0822  | 101.5448 | 2 | S 6   | 1669.8907 | 835.4490 |
| 289.1143  | 145.0608 | 3 | S 5   | 1582.8587 | 791.9330 |
| 436.1827  | 218.5950 | 4 | F 4   | 1495.8267 | 748.4170 |
| 523.2147  | 262.1110 | 5 | S 3   | 1348.7582 | 674.6028 |
| 1637.8281 | 819.4177 | 6 | K 2   | 1261.7262 | 631.3667 |
|           |          | 7 | K 1   | 147.1128  | 74.0600  |

[\[Click\]](#) to move table

Static Modifications:  
C: 57.0215  
Linked Peptide + Linker Mass: 986.52  
Linker Mass: 138.068

ISD TopBP11-766-strep (468) PsfIII (80)

GLFDNKR

|  
KNSSFSK

**GLFDNKR**, MH+ 1783.9336, m/z 446.7389

File: ACE\_0704\_BT01\_StageTip\_210min.mzML, Scan: 16316, Exp. m/z: 446.738952636719, Charge: 4

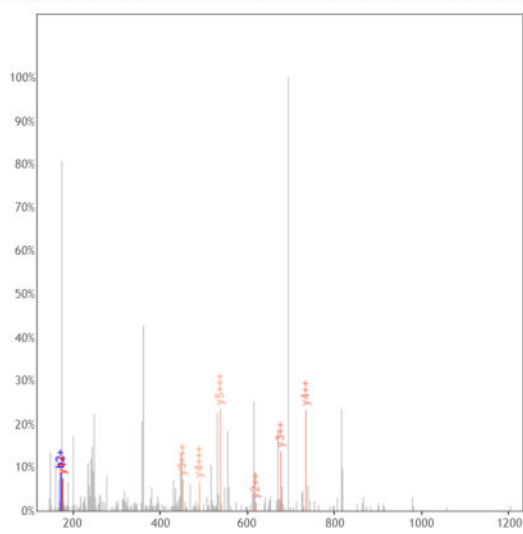

Click and drag in the plot to zoom X:  Y:  **Zoom Out** **Print**

Enable tooltip  Plot mass error

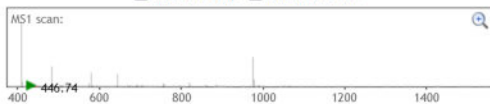

| b+        | b2+      | b3+      | # | Seq # | y+        | y2+      | y3+      |
|-----------|----------|----------|---|-------|-----------|----------|----------|
| 58.0287   | 29.5180  | 20.0144  | 1 | G 7   |           |          |          |
| 171.1128  | 86.0600  | 57.7091  | 2 | L 6   | 1726.9122 | 863.9597 | 576.3089 |
| 318.1812  | 159.5942 | 106.7319 | 3 | F 5   | 1613.8281 | 807.4177 | 538.6142 |
| 433.2082  | 217.1077 | 145.0742 | 4 | D 4   | 1466.7597 | 733.8835 | 489.9914 |
| 547.2511  | 274.1292 | 183.0885 | 5 | N 3   | 1351.7328 | 676.3700 | 451.2491 |
| 1609.8220 | 805.4146 | 537.2788 | 6 | K 2   | 1237.6898 | 619.3488 | 413.2348 |
|           |          |          | 7 | R 1   | 175.1190  | 88.0631  | 59.0445  |

[Click] to move table

Static Modifications:

C: 57.0215

Linked Peptide + Linker Mass: 934.48

Linker Mass: 138.068

**KNSSFSK**, MH+ 1783.9336, m/z 446.7389

File: ACE\_0704\_BT01\_StageTip\_210min.mzML, Scan: 16316, Exp. m/z: 446.738952636719, Charge: 4

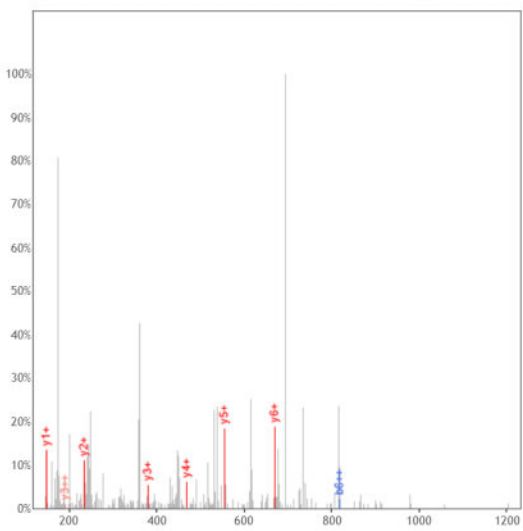

Click and drag in the plot to zoom X:  Y:  **Zoom Out** **Print**

Enable tooltip  Plot mass error

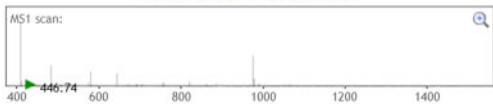

| b+        | b2+      | b3+      | # | Seq # | y+       | y2+      | y3+      |
|-----------|----------|----------|---|-------|----------|----------|----------|
| 1115.6207 | 558.3140 | 372.5451 | 1 | K 7   |          |          |          |
| 1229.6636 | 615.3354 | 410.5594 | 2 | N 6   | 669.3202 | 335.1638 | 223.7783 |
| 1316.6956 | 658.8515 | 439.5701 | 3 | S 5   | 555.2773 | 278.1423 | 185.7640 |
| 1403.7277 | 702.3675 | 468.5807 | 4 | S 4   | 468.2493 | 234.6263 | 156.7533 |
| 1550.7961 | 775.9017 | 517.6035 | 5 | F 3   | 381.2132 | 191.1103 | 127.7426 |
| 1637.8281 | 819.4177 | 546.6142 | 6 | S 2   | 234.1448 | 117.5761 | 78.7198  |
|           |          |          | 7 | K 1   | 147.1128 | 74.0600  | 49.7091  |

[Click] to move table

Static Modifications:

C: 57.0215

Linked Peptide + Linker Mass: 986.52

Linker Mass: 138.068

ISD TopBP11-766-strep (466) PsfIII (80)

AALLKK

|

GLFDNKR

**AALLKK**, MH+ 1629.9686, m/z 543.9944

File: ACE\_0704\_BT01\_StageTip\_210min.mzML, Scan: 21980, Exp. m/z: 543.994140625, Charge: 3

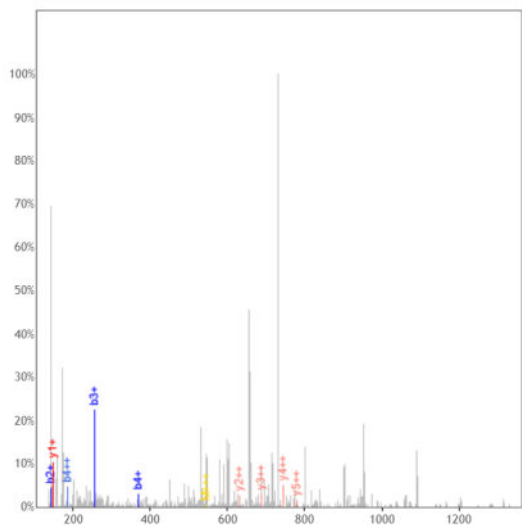

Click and drag in the plot to zoom X:  Y:  [Zoom Out](#) [Print](#)  Enable tooltip  Plot mass error

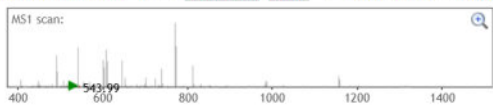

| b-        | b2-      | # | Seq # | y- | y2-      |
|-----------|----------|---|-------|----|----------|
| 72.0444   | 36.5258  | 1 | A     | 6  |          |
| 143.0815  | 72.0444  | 2 | A     | 5  | 779.9694 |
| 256.1656  | 128.5864 | 3 | L     | 4  | 744.4508 |
| 369.2496  | 185.1285 | 4 | L     | 3  | 687.9088 |
| 1483.8630 | 742.4352 | 5 | L     | 2  | 431.3667 |
|           |          | 6 | K     | 1  | 147.1128 |
|           |          |   |       |    | 74.0600  |

[\[Click\]](#) to move table

Static Modifications:

C: 57.0215

Linked Peptide + Linker Mass: 986.52

Linker Mass: 138.068

**GLFDNKR**, MH+ 1629.9686, m/z 543.9944

File: ACE\_0704\_BT01\_StageTip\_210min.mzML, Scan: 21980, Exp. m/z: 543.994140625, Charge: 3

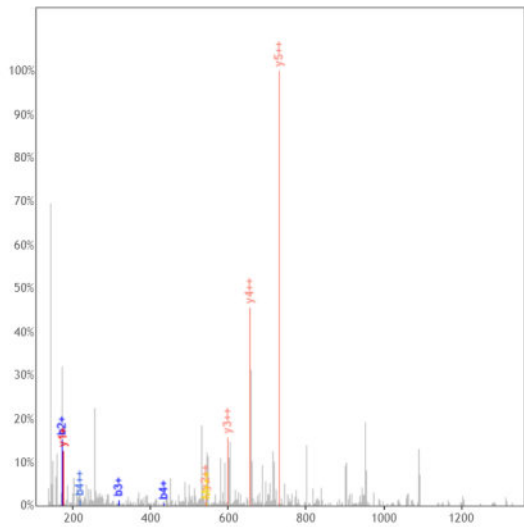

Click and drag in the plot to zoom X:  Y:  [Zoom Out](#) [Print](#)  Enable tooltip  Plot mass error

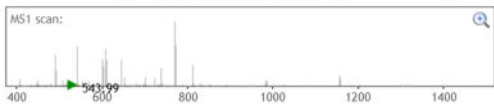

| b-        | b2-      | # | Seq # | y- | y2-      |
|-----------|----------|---|-------|----|----------|
| 58.0287   | 29.5180  | 1 | G     | 7  |          |
| 171.1128  | 86.0600  | 2 | L     | 6  | 786.9772 |
| 318.1812  | 159.5942 | 3 | F     | 5  | 730.4352 |
| 433.2082  | 217.1077 | 4 | D     | 4  | 656.9010 |
| 547.2511  | 274.1292 | 5 | N     | 3  | 599.3875 |
| 1455.8569 | 728.4321 | 6 | K     | 2  | 342.3660 |
|           |          | 7 | R     | 1  | 175.1190 |
|           |          |   |       |    | 88.0631  |

[\[Click\]](#) to move table

Static Modifications:

C: 57.0215

Linked Peptide + Linker Mass: 780.51

Linker Mass: 138.068

ISD TopBP11-766-strep (480) PsfIII (74)  
 DFAPSEKHEQADEDLLSQYENGSSSTVVEAK  
 |  
 LELPLWLAKGLFDNK

DFAPSEKHEQADEDLLSQYENGSSSTVVEAK, MH+ 5217.5790, m/z 1044.3216

File: ACE\_0704\_BT01\_StageTip\_210min-calib.ms2ML, Scan: 57130, Exp. m/z: 1045.1219288370896, Charge: 5

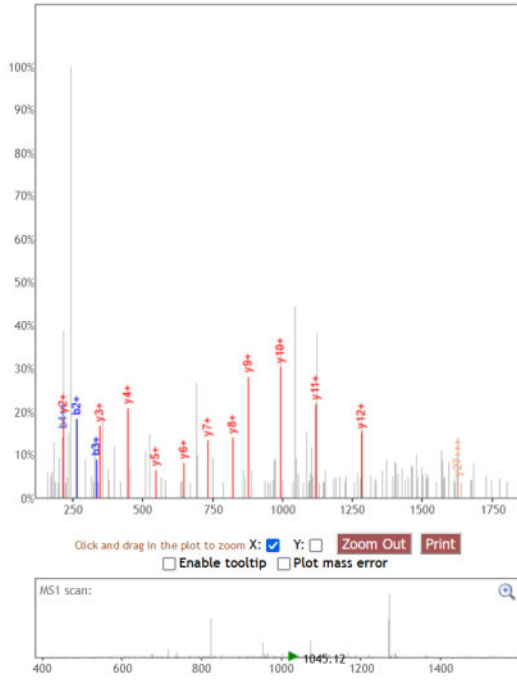

| b+        | b2+       | b3+       | #  | Seq | #  | y+        | y2+       | y3+       |
|-----------|-----------|-----------|----|-----|----|-----------|-----------|-----------|
| 116.0342  | 58.5207   | 39.3496   | 1  | D   | 30 |           |           |           |
| 263.1026  | 132.0550  | 88.3724   | 2  | F   | 29 | 5102.5521 | 2551.7797 | 1701.5222 |
| 334.1397  | 167.5735  | 112.0514  | 3  | A   | 28 | 4955.4837 | 2478.2455 | 1652.4994 |
| 431.1925  | 216.0999  | 144.4024  | 4  | P   | 27 | 4884.4466 | 2442.7269 | 1628.8204 |
| 2412.2850 | 1206.6461 | 804.7665  | 5  | S   | 26 | 4787.3938 | 2394.2005 | 1596.4695 |
| 2541.3276 | 1271.1674 | 847.7807  | 6  | E   | 25 | 2806.3014 | 1403.6543 | 936.1053  |
| 2669.4225 | 1335.2149 | 890.4790  | 7  | K   | 24 | 2677.2588 | 1339.1330 | 893.0911  |
| 2806.4814 | 1403.7444 | 936.1653  | 8  | H   | 23 | 2549.1638 | 1275.0855 | 850.3928  |
| 2935.5240 | 1468.2656 | 979.1795  | 9  | E   | 22 | 2412.1049 | 1206.5561 | 804.7065  |
| 3063.5826 | 1532.2949 | 1021.8657 | 10 | Q   | 21 | 2283.0623 | 1142.0348 | 761.6923  |
| 3134.6197 | 1567.8135 | 1045.5448 | 11 | A   | 20 | 2155.0037 | 1078.0055 | 719.0061  |
| 3249.6467 | 1625.3270 | 1083.8871 | 12 | D   | 19 | 2083.9666 | 1042.4869 | 695.3271  |
| 3378.6893 | 1689.8483 | 1126.9013 | 13 | E   | 18 | 1968.9397 | 984.9735  | 656.9847  |
| 3493.7162 | 1747.3617 | 1165.2436 | 14 | D   | 17 | 1839.8971 | 920.4522  | 613.9705  |
| 3606.8003 | 1803.9038 | 1202.9383 | 15 | L   | 16 | 1724.8701 | 862.9387  | 575.6282  |
| 3719.8843 | 1860.4458 | 1240.6330 | 16 | L   | 15 | 1611.7861 | 806.3967  | 537.9335  |
| 3806.9164 | 1903.9618 | 1269.6436 | 17 | S   | 14 | 1498.7020 | 749.8546  | 500.2388  |
| 3934.9749 | 1967.9911 | 1312.3298 | 18 | Q   | 13 | 1411.6700 | 706.3386  | 471.2282  |
| 4098.0383 | 2049.5228 | 1366.6843 | 19 | Y   | 12 | 1203.6114 | 642.3093  | 428.5420  |
| 4227.0808 | 2114.0441 | 1409.6985 | 20 | E   | 11 | 1120.5481 | 560.7777  | 374.1875  |
| 4341.1238 | 2171.0655 | 1447.7128 | 21 | N   | 10 | 991.5055  | 496.2564  | 331.1733  |
| 4398.1452 | 2199.5763 | 1466.7199 | 22 | G   | 9  | 877.4625  | 439.2349  | 293.1590  |
| 4485.1773 | 2243.0923 | 1495.7306 | 23 | S   | 8  | 820.4411  | 410.7242  | 274.1519  |
| 4572.2093 | 2286.6083 | 1524.7413 | 24 | S   | 7  | 733.4090  | 367.2082  | 245.1412  |
| 4673.2570 | 2337.1321 | 1558.4238 | 25 | T   | 6  | 646.3770  | 323.6921  | 216.1305  |
| 4772.3254 | 2386.6663 | 1591.4466 | 26 | V   | 5  | 545.3293  | 273.1683  | 182.4480  |
| 4871.3938 | 2436.2005 | 1624.4695 | 27 | V   | 4  | 446.2609  | 223.6341  | 149.4252  |
| 5000.4364 | 2500.7218 | 1667.4836 | 28 | E   | 3  | 347.1925  | 174.0999  | 116.4024  |
| 5071.4735 | 2536.2404 | 1691.1627 | 29 | A   | 2  | 218.1499  | 109.5786  | 73.3882   |
|           |           |           | 30 | K   | 1  | 147.1128  | 74.0600   | 49.7091   |

(Click) to move table  
 Linked Peptide + Linker Mass: 1894.06  
 Linker Mass: 138.06808

LELPLWLAKGLFDNK, MH+ 5217.5790, m/z 1044.3216

File: ACE\_0704\_BT01\_StageTip\_210min-calib.ms2ML, Scan: 57130, Exp. m/z: 1045.1219288370896, Charge: 5

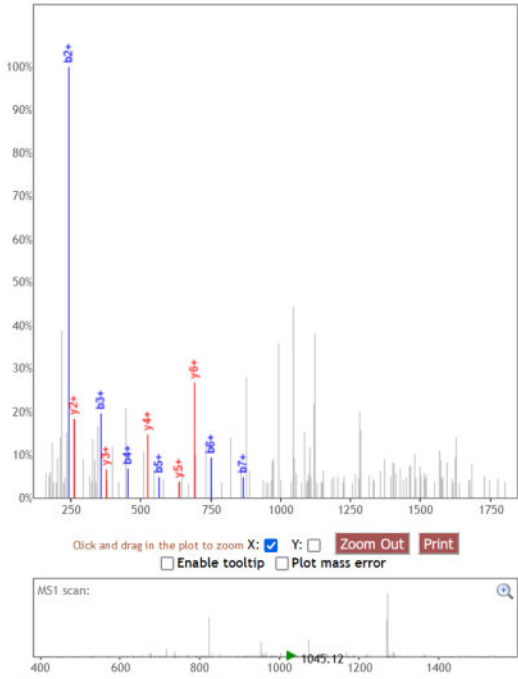

| b+        | b2+       | b3+       | #  | Seq | #  | y+        | y2+       | y3+       |
|-----------|-----------|-----------|----|-----|----|-----------|-----------|-----------|
| 114.0913  | 57.5493   | 38.7020   | 1  | L   | 15 |           |           |           |
| 243.1339  | 122.0706  | 81.7162   | 2  | E   | 14 | 5104.4950 | 2552.7511 | 1702.1698 |
| 356.2100  | 178.6126  | 119.4108  | 3  | L   | 13 | 4975.4524 | 2488.2298 | 1659.1556 |
| 453.2708  | 227.1390  | 151.7618  | 4  | P   | 12 | 4862.3683 | 2431.6878 | 1621.4610 |
| 566.3548  | 283.6811  | 189.4565  | 5  | L   | 11 | 4765.3156 | 2383.1614 | 1589.1100 |
| 752.4341  | 376.7207  | 251.4829  | 6  | W   | 10 | 4652.2315 | 2326.6194 | 1551.4153 |
| 865.5102  | 433.2627  | 289.1776  | 7  | L   | 9  | 4466.1522 | 2233.5797 | 1489.3889 |
| 936.5553  | 468.7813  | 312.8566  | 8  | A   | 8  | 4353.0681 | 2177.0377 | 1451.6942 |
| 4525.2297 | 2263.1185 | 1509.0814 | 9  | K   | 7  | 4282.0310 | 2141.5191 | 1428.0152 |
| 4582.2512 | 2291.6292 | 1528.0886 | 10 | G   | 6  | 693.3566  | 347.1819  | 231.7904  |
| 4695.3352 | 2348.1713 | 1565.7833 | 11 | L   | 5  | 636.3352  | 318.6712  | 212.7832  |
| 4842.4036 | 2421.7055 | 1614.8061 | 12 | F   | 4  | 523.2511  | 262.1292  | 175.0885  |
| 4957.4306 | 2479.2189 | 1653.1484 | 13 | D   | 3  | 376.1827  | 188.5950  | 126.0657  |
| 5071.4735 | 2536.2404 | 1691.1627 | 14 | N   | 2  | 261.1557  | 131.0815  | 87.7234   |
|           |           |           | 15 | K   | 1  | 147.1128  | 74.0600   | 49.7091   |

(Click) to move table  
 Linked Peptide + Linker Mass: 3460.58  
 Linker Mass: 138.06808
