# Supplementary material for: TopBP1 utilises a bipartite GINS binding mode to support genome replication
Source: PubMed Central journal article supplement (PMC10899662; doi:10.1038/s41467-024-45946-0), 2024-02-27
Supplement: 41467_2024_45946_MOESM7_ESM.pdf [file 41467_2024_45946_MOESM7_ESM.pdf]

## Reporting Summary

Nature Portfolio wishes to improve the reproducibility of the work that we publish. This form provides structure for consistency and transparency in reporting. For further information on Nature Portfolio policies, see our [Editorial Policies](#) and the [Editorial Policy Checklist](#).

### Statistics

For all statistical analyses, confirm that the following items are present in the figure legend, table legend, main text, or Methods section.

- | n/a                                 | Confirmed                                                                                                                                                                                                                                                                                      |
|-------------------------------------|------------------------------------------------------------------------------------------------------------------------------------------------------------------------------------------------------------------------------------------------------------------------------------------------|
| <input type="checkbox"/>            | <input checked="" type="checkbox"/> The exact sample size ( $n$ ) for each experimental group/condition, given as a discrete number and unit of measurement                                                                                                                                    |
| <input type="checkbox"/>            | <input checked="" type="checkbox"/> A statement on whether measurements were taken from distinct samples or whether the same sample was measured repeatedly                                                                                                                                    |
| <input type="checkbox"/>            | <input checked="" type="checkbox"/> The statistical test(s) used AND whether they are one- or two-sided<br><i>Only common tests should be described solely by name; describe more complex techniques in the Methods section.</i>                                                               |
| <input checked="" type="checkbox"/> | <input type="checkbox"/> A description of all covariates tested                                                                                                                                                                                                                                |
| <input checked="" type="checkbox"/> | <input type="checkbox"/> A description of any assumptions or corrections, such as tests of normality and adjustment for multiple comparisons                                                                                                                                                   |
| <input type="checkbox"/>            | <input checked="" type="checkbox"/> A full description of the statistical parameters including central tendency (e.g. means) or other basic estimates (e.g. regression coefficient) AND variation (e.g. standard deviation) or associated estimates of uncertainty (e.g. confidence intervals) |
| <input type="checkbox"/>            | <input checked="" type="checkbox"/> For null hypothesis testing, the test statistic (e.g. $F$ , $t$ , $r$ ) with confidence intervals, effect sizes, degrees of freedom and $P$ value noted<br><i>Give <math>P</math> values as exact values whenever suitable.</i>                            |
| <input checked="" type="checkbox"/> | <input type="checkbox"/> For Bayesian analysis, information on the choice of priors and Markov chain Monte Carlo settings                                                                                                                                                                      |
| <input checked="" type="checkbox"/> | <input type="checkbox"/> For hierarchical and complex designs, identification of the appropriate level for tests and full reporting of outcomes                                                                                                                                                |
| <input checked="" type="checkbox"/> | <input type="checkbox"/> Estimates of effect sizes (e.g. Cohen's $d$ , Pearson's $r$ ), indicating how they were calculated                                                                                                                                                                    |

*Our web collection on [statistics for biologists](#) contains articles on many of the points above.*

### Software and code

Policy information about [availability of computer code](#)

|                 |                                                                                                                                                                                                                                                                                                                                                                                                   |
|-----------------|---------------------------------------------------------------------------------------------------------------------------------------------------------------------------------------------------------------------------------------------------------------------------------------------------------------------------------------------------------------------------------------------------|
| Data collection | Cluspro, MDockPep, HPEPDOCK, FlexPepDock, Colab AlphaFold advanced (initialial Psf1-TopBP1 model), AI600 Imaging system (GE healthcare); AlphaFold Multimer version 2.2.0; Cytiva UNICORN 5.3.1; Orbitrap Fusion Lumos Tune Application (3.3.2782.28); Xcalibur (4.3.73.11); MaxQuant (v2.0.3.0); MetaMorpheus (0.0.320); pLink2 (2.3.9); EPU (Thermo Fisher Scientific); cryoSPARC; Coot, Phenix |
| Data analysis   | Adobe Illustrator 2020 26.0.2 and 2022 v24.3; Chimera X, Adobe Photoshop 2020 21.2.3 and 2022 v24.1.0, ImageJ 1.51j8; ProXL: metaMorph2ProxXML.jar; plink2toProxXML.jar; Microsoft Excel (16.68); RELION4.0; MOTIONCORE2 implemented in RELION4.0; Alphapickle 1.5.4                                                                                                                              |

For manuscripts utilizing custom algorithms or software that are central to the research but not yet described in published literature, software must be made available to editors and reviewers. We strongly encourage code deposition in a community repository (e.g. GitHub). See the Nature Portfolio [guidelines for submitting code & software](#) for further information.

## Data

Policy information about [availability of data](#)

All manuscripts must include a [data availability statement](#). This statement should provide the following information, where applicable:

- Accession codes, unique identifiers, or web links for publicly available datasets
- A description of any restrictions on data availability
- For clinical datasets or third party data, please ensure that the statement adheres to our [policy](#)

The mass spectrometry proteomics data for the proximity dependent biotinylation experiments, the cross-linking experiments and the chromatin mass spectrometry (CHROMASS) experiments have been deposited to the ProteomeXchange Consortium via the PRIDE88 partner repository (<https://www.ebi.ac.uk/pride/archive/>) with the dataset identifiers PXD040000 (PDB experiments), PXD040156 (CL-MS experiments) and PXD040024 (CHROMASS experiments). During the review process the data can be accessed via the following Reviewer accounts:

PXD040000: (Username: reviewer\_pxd040000@ebi.ac.uk; Password: Lk9VLXVF)

PXD040156: (Username: reviewer\_pxd040156@ebi.ac.uk; Password: NLNLRQJ)

PXD040024: (Username: reviewer\_pxd040024@ebi.ac.uk; Password: 5OGweuE6)

Cryo-EM maps and refined coordinates have been deposited in the EMDB and Protein Databank as EMD- 16916 and PDB ID 8OK2 respectively.

## Research involving human participants, their data, or biological material

Policy information about studies with [human participants or human data](#). See also policy information about [sex, gender \(identity/presentation\), and sexual orientation](#) and [race, ethnicity and racism](#).

|                                                                    |                                  |
|--------------------------------------------------------------------|----------------------------------|
| Reporting on sex and gender                                        | <input type="text" value="N/A"/> |
| Reporting on race, ethnicity, or other socially relevant groupings | <input type="text" value="N/A"/> |
| Population characteristics                                         | <input type="text" value="N/A"/> |
| Recruitment                                                        | <input type="text" value="N/A"/> |
| Ethics oversight                                                   | <input type="text" value="N/A"/> |

Note that full information on the approval of the study protocol must also be provided in the manuscript.

## Field-specific reporting

Please select the one below that is the best fit for your research. If you are not sure, read the appropriate sections before making your selection.

Life sciences     Behavioural & social sciences     Ecological, evolutionary & environmental sciences

For a reference copy of the document with all sections, see [nature.com/documents/nr-reporting-summary-flat.pdf](https://www.nature.com/documents/nr-reporting-summary-flat.pdf)

## Life sciences study design

All studies must disclose on these points even when the disclosure is negative.

|                 |                                                                                                                                                                                                                                                                                                                                                                                                                                                                                                                                                                                                                                                                                                                                                                                                                                                                                                                                                                                                                                                                                                                                                                                                                                                                                                                                                                                                                           |
|-----------------|---------------------------------------------------------------------------------------------------------------------------------------------------------------------------------------------------------------------------------------------------------------------------------------------------------------------------------------------------------------------------------------------------------------------------------------------------------------------------------------------------------------------------------------------------------------------------------------------------------------------------------------------------------------------------------------------------------------------------------------------------------------------------------------------------------------------------------------------------------------------------------------------------------------------------------------------------------------------------------------------------------------------------------------------------------------------------------------------------------------------------------------------------------------------------------------------------------------------------------------------------------------------------------------------------------------------------------------------------------------------------------------------------------------------------|
| Sample size     | <input type="text" value="Replication experiments averaging DNA synthesis values (incorporation of radioactive nucleotide) were done based on three biological replicates. The chromass experiment used four independent biological replicates. APEX2-based proximity biotinylation experiments used four biological replicates. No sample size calculation was performed. Sample size was chosen in order to allow statistically sufficient conclusions."/>                                                                                                                                                                                                                                                                                                                                                                                                                                                                                                                                                                                                                                                                                                                                                                                                                                                                                                                                                              |
| Data exclusions | <input type="text" value="none"/>                                                                                                                                                                                                                                                                                                                                                                                                                                                                                                                                                                                                                                                                                                                                                                                                                                                                                                                                                                                                                                                                                                                                                                                                                                                                                                                                                                                         |
| Replication     | <input type="text" value="DNA replication experiments using Xenopus egg extracts in the main figures were done were done with three independent biological replicates, and subsequent quantifications were statistically analysed using standard error of the mean. Two independent anti-TopBP1 antibodies were used and gave similar results. The two DNA replication experiments shown in the supplementary information (Suppl Fig 13a/b) used two replicates (both individually depicted) that showed similar results with two independent anti-TopBP1 antibodies. Xenopus egg extracts were pre-tested before complementation experiments for replication capacity. Using tested extracts all attempts to replicate results were successful. APEX2-proximity biotinylations and chromass experiments were done from four biological replicates and analysed by extensive statistical testing as indicated in the methods section. We show 3 such experiments that showed a high degree of overlap. Relevant hits that were not found in all three replicates (probably due to low abundance) are discussed in the manuscript. Biochemical binding experiments were replicated at least once. Our CHROMASS experiment (Fig 6) was done on the basis of 4 independent replicate samples that showed a high degree of overlap. Statistics(2-sided Student's test) was used to extract statistically significant hits."/> |
| Randomization   | <input type="text" value="The techniques used do not benefit from randomisation"/>                                                                                                                                                                                                                                                                                                                                                                                                                                                                                                                                                                                                                                                                                                                                                                                                                                                                                                                                                                                                                                                                                                                                                                                                                                                                                                                                        |

## Reporting for specific materials, systems and methods

We require information from authors about some types of materials, experimental systems and methods used in many studies. Here, indicate whether each material, system or method listed is relevant to your study. If you are not sure if a list item applies to your research, read the appropriate section before selecting a response.

### Materials & experimental systems

| n/a                      | Involved in the study                                           |
|--------------------------|-----------------------------------------------------------------|
| <input type="checkbox"/> | <input checked="" type="checkbox"/> Antibodies                  |
| <input type="checkbox"/> | <input checked="" type="checkbox"/> Eukaryotic cell lines       |
| <input type="checkbox"/> | <input type="checkbox"/> Palaeontology and archaeology          |
| <input type="checkbox"/> | <input checked="" type="checkbox"/> Animals and other organisms |
| <input type="checkbox"/> | <input type="checkbox"/> Clinical data                          |
| <input type="checkbox"/> | <input type="checkbox"/> Dual use research of concern           |
| <input type="checkbox"/> | <input type="checkbox"/> Plants                                 |

### Methods

| n/a                                 | Involved in the study                           |
|-------------------------------------|-------------------------------------------------|
| <input checked="" type="checkbox"/> | <input type="checkbox"/> ChIP-seq               |
| <input type="checkbox"/>            | <input type="checkbox"/> Flow cytometry         |
| <input type="checkbox"/>            | <input type="checkbox"/> MRI-based neuroimaging |

## Antibodies

### Antibodies used

Anti-DB4, human TopBP1-1-360, rabbit, self-made  
 Anti-human Sld5-1-100, rabbit monoclonal ERP9318, Abcam ab139683  
 Anti-Flag peptide, mouse, clone M2, Sigma F1804  
 Anti-human 53BP1-350-400, rabbit, Invitrogen PA1-16565  
 Anti-Myc tag, mouse, clone 9E10  
 Anti-Xenopus TopBP1-1-365 (no. 1), rabbit, self-made  
 Anti-XTopBP1-999-1299 (no. 2), rabbit, self-made,  
 Anti-Xenopus Cdc45/ rabbit, self-made  
 Anti-Xenopus Sld5, rabbit, self-made  
 Anti-Xenopus PolE2, rabbit, self-made  
 Anti-Mcm6-775-821, rabbit, BETHYL A300-194A  
 Anti-Mcm4 -750-850, rabbit, Abcam ab4459  
 Anti-MBP tag, mouse, New England Biolabs E8032S

### Validation

Anti-DB4: RNAi and co-IP with Treslin/TICRR and western blotting  
 anti human Sld5: rec protein and western blotting  
 Flag-peptide: Flag peptide IP and western blotting  
 53BP1: co-IP with TopBP1 and western blotting  
 Anti-Myc tag: IP of Myc-TopBP1 and western blotting  
 Anti-Xenopus TopBP1- no1 and 2: IP and cross antibody western blotting; immunodepletion from Xenopus extracts and rescue by rec TopBP1  
 Anti-XCdc45 and anti-XSld5: geminin-sensitive chromatin association from Xenopus egg extracts  
 Anti-Mcm4 and 6: geminin-sensitive loading on chromatin in Xenopus egg extracts

## Eukaryotic cell lines

Policy information about [cell lines and Sex and Gender in Research](#)

### Cell line source(s)

HEK293T cells ATCC CRL-11268; SF9 cells CRL-1711

### Authentication

Cells showed typical microscopic appearance; because cells were not used for physiological experiments no detailed molecular authentication was required

### Mycoplasma contamination

negative in regular mycoplasma testing using routine commercial tests

### Commonly misidentified lines (See [ICLAC](#) register)

not applicable

## Palaeontology and Archaeology

### Specimen provenance

*Provide provenance information for specimens and describe permits that were obtained for the work (including the name of the issuing authority, the date of issue, and any identifying information). Permits should encompass collection and, where applicable, export.*

Specimen deposition

Dating methods

Tick this box to confirm that the raw and calibrated dates are available in the paper or in Supplementary Information.

Ethics oversight

Note that full information on the approval of the study protocol must also be provided in the manuscript.

## Animals and other research organisms

Policy information about [studies involving animals](#); [ARRIVE guidelines](#) recommended for reporting animal research, and [Sex and Gender in Research](#)

Laboratory animals

Wild animals

Reporting on sex

Field-collected samples

Ethics oversight

Note that full information on the approval of the study protocol must also be provided in the manuscript.

## Clinical data

Policy information about [clinical studies](#)

All manuscripts should comply with the ICMJE [guidelines for publication of clinical research](#) and a completed [CONSORT checklist](#) must be included with all submissions.

Clinical trial registration

Study protocol

Data collection

Outcomes

## Dual use research of concern

Policy information about [dual use research of concern](#)

### Hazards

Could the accidental, deliberate or reckless misuse of agents or technologies generated in the work, or the application of information presented in the manuscript, pose a threat to:

| No                                  | Yes                      |                            |
|-------------------------------------|--------------------------|----------------------------|
| <input checked="" type="checkbox"/> | <input type="checkbox"/> | Public health              |
| <input checked="" type="checkbox"/> | <input type="checkbox"/> | National security          |
| <input checked="" type="checkbox"/> | <input type="checkbox"/> | Crops and/or livestock     |
| <input checked="" type="checkbox"/> | <input type="checkbox"/> | Ecosystems                 |
| <input checked="" type="checkbox"/> | <input type="checkbox"/> | Any other significant area |

## Experiments of concern

Does the work involve any of these experiments of concern:

| No                                  | Yes                                                                                                  |
|-------------------------------------|------------------------------------------------------------------------------------------------------|
| <input checked="" type="checkbox"/> | <input type="checkbox"/> Demonstrate how to render a vaccine ineffective                             |
| <input checked="" type="checkbox"/> | <input type="checkbox"/> Confer resistance to therapeutically useful antibiotics or antiviral agents |
| <input checked="" type="checkbox"/> | <input type="checkbox"/> Enhance the virulence of a pathogen or render a nonpathogen virulent        |
| <input checked="" type="checkbox"/> | <input type="checkbox"/> Increase transmissibility of a pathogen                                     |
| <input checked="" type="checkbox"/> | <input type="checkbox"/> Alter the host range of a pathogen                                          |
| <input checked="" type="checkbox"/> | <input type="checkbox"/> Enable evasion of diagnostic/detection modalities                           |
| <input checked="" type="checkbox"/> | <input type="checkbox"/> Enable the weaponization of a biological agent or toxin                     |
| <input checked="" type="checkbox"/> | <input type="checkbox"/> Any other potentially harmful combination of experiments and agents         |

## Flow Cytometry

### Plots

Confirm that:

- The axis labels state the marker and fluorochrome used (e.g. CD4-FITC).
- The axis scales are clearly visible. Include numbers along axes only for bottom left plot of group (a 'group' is an analysis of identical markers).
- All plots are contour plots with outliers or pseudocolor plots.
- A numerical value for number of cells or percentage (with statistics) is provided.

### Methodology

|                           |                                                            |
|---------------------------|------------------------------------------------------------|
| Sample preparation        | <input type="text" value="not applicable for this study"/> |
| Instrument                | <input type="text" value="not applicable for this study"/> |
| Software                  | <input type="text" value="not applicable for this study"/> |
| Cell population abundance | <input type="text" value="not applicable for this study"/> |
| Gating strategy           | <input type="text" value="not applicable for this study"/> |

- Tick this box to confirm that a figure exemplifying the gating strategy is provided in the Supplementary Information.

## Magnetic resonance imaging

### Experimental design

|                                 |                                                            |
|---------------------------------|------------------------------------------------------------|
| Design type                     | <input type="text" value="not applicable for this study"/> |
| Design specifications           | <input type="text" value="not applicable for this study"/> |
| Behavioral performance measures | <input type="text" value="not applicable for this study"/> |

### Acquisition

|                               |                                                                 |
|-------------------------------|-----------------------------------------------------------------|
| Imaging type(s)               | <input type="text" value="not applicable for this study"/>      |
| Field strength                | <input type="text" value="not applicable for this study"/>      |
| Sequence & imaging parameters | <input type="text" value="not applicable for this study"/>      |
| Area of acquisition           | <input type="text" value="not applicable for this study"/>      |
| Diffusion MRI                 | <input type="checkbox"/> Used <input type="checkbox"/> Not used |

## Preprocessing

|                            |                               |
|----------------------------|-------------------------------|
| Preprocessing software     | not applicable for this study |
| Normalization              | not applicable for this study |
| Normalization template     | not applicable for this study |
| Noise and artifact removal | not applicable for this study |
| Volume censoring           | not applicable for this study |

## Statistical modeling & inference

|                                                                                                                                 |                               |
|---------------------------------------------------------------------------------------------------------------------------------|-------------------------------|
| Model type and settings                                                                                                         | not applicable for this study |
| Effect(s) tested                                                                                                                | not applicable for this study |
| Specify type of analysis: <input type="checkbox"/> Whole brain <input type="checkbox"/> ROI-based <input type="checkbox"/> Both |                               |
| Statistic type for inference                                                                                                    | not applicable for this study |
| (See <a href="#">Eklund et al. 2016</a> )                                                                                       |                               |
| Correction                                                                                                                      | not applicable for this study |

## Models & analysis

| n/a                                 | Involvement in the study                                              |
|-------------------------------------|-----------------------------------------------------------------------|
| <input checked="" type="checkbox"/> | <input type="checkbox"/> Functional and/or effective connectivity     |
| <input checked="" type="checkbox"/> | <input type="checkbox"/> Graph analysis                               |
| <input checked="" type="checkbox"/> | <input type="checkbox"/> Multivariate modeling or predictive analysis |
